# Supplementary material for: The Highly Reduced Plastome of Mycoheterotrophic Sciaphila (Triuridaceae) Is Colinear with Its Green Relatives and Is under Strong Purifying Selection
Source: PubMed Central journal article supplement — Genome Biol Evol. 2015 Jun 13;7(8):2220–36. doi: 10.1093/gbe/evv134 (PMC4558852; doi:10.1093/gbe/evv134), 2015-06-13
Supplement: supp_evv134_Suppl_tables.pdf [file supp_evv134_Suppl_tables.pdf]

Supplementary Table S1. Specimen source information; herbarium abbreviations follow Thiers (continuously updated).

| Species <sup>1</sup>                          | Family        | Voucher number<br>[Collector number (herbarium)] | GenBank accession   |
|-----------------------------------------------|---------------|--------------------------------------------------|---------------------|
| <b>Pandanales</b>                             |               |                                                  |                     |
| <i>Carludovica palmata</i> Ruiz & Pav.        | Cyclanthaceae | M.W. Chase 14836, K                              | KP462882.1          |
| <i>Cyclanthus bipartitus</i> Poit. ex A. Rich | Cyclanthaceae | M.W. Chase 1237, K                               | KT205192 - KT205273 |
| <i>Freycinetia banksii</i> A. Cunn            | Pandanaceae   | S.W. Graham 02-03-14, UBC                        | KT205110 - KT205191 |
| <i>Sararanga sinuosa</i> Hemsl.               | Pandanaceae   | Gallaher 461, BISH, HAW                          | KT204539 - KT204619 |
| <i>Croomia japonica</i> Miq.                  | Stemonaceae   | Rothwell & Stockey 43, ALTA                      | KT204620 - KT204701 |
| <i>Stemona tuberosa</i> Lour.                 | Stemonaceae   | Rothwell & Stockey 46, ALTA                      | KT204702 - KT204783 |
| <i>Stichoneuron caudatum</i> Ridl.            | Stemonaceae   | Rothwell & Stockey 45, ALTA                      | KT204946 - KT205027 |
| <i>Pentastemona sumatrana</i> Steenis         | Stemonaceae   | B.G. Leiden 910375, K                            | KT205028 - KT205109 |
| <i>Sciaphila densiflora</i> Schltr.           | Triuridaceae  | Pillon Y. <i>et al.</i> 88, NOU, P               | KR902497.1          |
| <i>Xerophyta retinervis</i> Baker             | Velloziaceae  | B.G. Reeves 14, NBG                              | KT204784 - KT204865 |
| <b>Dioscoreales</b>                           |               |                                                  |                     |
| <i>Lophiola aurea</i> Ker Gawl.               | Nartheciaceae | Whitten 95028, K                                 | KT204866 - KT204945 |

<sup>1</sup> Additional sequences: *Acorus calamus* L. (NC\_007407), *Alstroemeria aurea* Graham (KC968976), *Amborella trichopoda* Baill. (NC\_005086), *Buxus microphylla* Siebold & Zucc. (NC\_009599), *Calycanthus floridus* var. *glaucus* (Willd.) Torr. & A.Gray (NC\_004993), *Dioscorea elephantipes* (NC\_009601), *Drimys granadensis* L.f. (NC\_008456), *Elaeis oleifera* (Kunth) Cortés (EU016883–EU016962), *Fritillaria taipaiensis* P.Y. Li (NC\_023247), *Hordeum vulgare* L. (NC\_008590), *Illicium oligandrum* Merr. & Chun (NC\_009600), *Japonolirion osense* Nakai (JQ068951- JQ069028), *Lemna minor* L. (NC\_010109), *Lilium longiflorum* Thunb. (KC968977), *Liriodendron tulipifera* L. (NC\_008326), *Musa acuminata* Colla (EU016983–EU017063), *Nandina domestica* Thunb. (NC\_008336), *Nuphar advena* (Aiton) W.T.Aiton (NC\_008788), *Oncidium* Sw. Gower Ramsey (NC\_014056), *Orontium aquaticum* L. (NC\_010109), *Oryza sativa* L. (NC\_001320), *Phalaenopsis aphrodite* Rchb.f. subsp. *formosana* (NC\_007499.1), *Phoenix dactylifera* L. (NC\_013991), *Piper cenocladum* C.DC. (NC\_008457), *Plantanus occidentalis* L. (NC\_008335), *Saccharum officinarum* L. (NC\_006084), *Smilax china* L. (HM536959), *Sorghum bicolor* (L.) Moench (NC\_008602), *Spirodela polyrhiza* (L.) Schleid. (NC\_015891), *Triticum aestivum* L. (NC\_002762), *Typha latifolia* L. (NC\_013823), *Veratrum patulum* Loes. (NC\_022715), *Vitis vinifera* L. (NC\_007957), *Wolffia australiana* (Benth.) Hartog & Plas (NC\_015899), *Wolffiella lingulata* (Hegelm.) Hegelm. (NC\_015894), *Yucca schidigera* Ortgies (DQ069337–DQ069702, EU016681– EU016700), *Zea mays* L. (NC\_001666). For additional taxa, see Givnish *et al.* (2010) (Arecales, Asparagales, Commelinales, Dasygogonales, Poales), Barrett *et al.* (2013) (Arecales, Commelinales, Dasygogonales, Zingiberales), and Mennes *et al.* (2015) (Liliales and Pandanales)

Supplementary Table S2. Data partitioning schemes inferred using PartitionFinder or PartitionFinderProtein with the BIC criterion. (a) “Codon” partitioning scheme for the nucleotide matrix; (b) “GxC” (gene x codon) partitioning scheme; (c) Amino-acid partitioning scheme; and (d) GxC (gene x codon) partitioning scheme for matrix with re-alignments for *accD*, *rpl20* and *rps18* (see text for details). Plastid genes are indicated before the underscore; the ‘pos’ term after an underscore indicates the codon position (not applicable for *rrn* genes).

| Partition no. | Best Model | Partition subsets                                                                                                                                                                                                                                                                                                                                                                                                                                                           |
|---------------|------------|-----------------------------------------------------------------------------------------------------------------------------------------------------------------------------------------------------------------------------------------------------------------------------------------------------------------------------------------------------------------------------------------------------------------------------------------------------------------------------|
| a)            |            |                                                                                                                                                                                                                                                                                                                                                                                                                                                                             |
| 1             | GTR + G    | codon_pos1                                                                                                                                                                                                                                                                                                                                                                                                                                                                  |
| 2             | GTR + G    | codon_pos2                                                                                                                                                                                                                                                                                                                                                                                                                                                                  |
| 3             | GTR + G    | codon_pos3                                                                                                                                                                                                                                                                                                                                                                                                                                                                  |
| 4             | GTR + G    | rrn16, rrn23, rrn4.5, rrn5                                                                                                                                                                                                                                                                                                                                                                                                                                                  |
| b)            |            |                                                                                                                                                                                                                                                                                                                                                                                                                                                                             |
| 1             | GTR + G    | accD_pos1, accD_pos2, clpP_pos3, lhbA_pos3, matK_pos2, ndhF_pos1, ndhF_pos2, petG_pos3, psbE_pos3, psbH_pos2, psbJ_pos2, psbJ_pos3, psbL_pos2, rpl16_pos1, rpl22_pos1, rpl22_pos2, rpl32_pos1, rps14_pos3, rps16_pos2, rps4_pos3, ycf3_pos2, ycf3_pos3                                                                                                                                                                                                                      |
| 2             | GTR + G    | accD_pos3, atpB_pos3, atpE_pos3, atpF_pos3, atpI_pos3, matK_pos1, ndhC_pos3, ndhJ_pos3, ndhK_pos3, petN_pos3, psaI_pos2, psbA_pos3, psbD_pos3, psbH_pos3, psbK_pos3, rpl14_pos3, rpl20_pos3, rpl32_pos2, rpl33_pos3, rpoA_pos3, rpoB_pos3, rpoC1_pos3, rps2_pos3, rps8_pos3                                                                                                                                                                                                 |
| 3             | GTR + G    | 5rps12_pos3, atpA_pos1, atpA_pos2, atpF_pos1, clpP_pos1, ndhA_pos1, psaC_pos2, psaI_pos3, psbH_pos1, psbM_pos2, rbcL_pos1, rbcL_pos2, rpl20_pos2, rpoC2_pos1, rps15_pos1, rps16_pos1, rps18_pos3, rps3_pos1, rps8_pos1, ycf4_pos1                                                                                                                                                                                                                                           |
| 4             | GTR + G    | atpA_pos3, matK_pos3, ndhE_pos3, petD_pos3, psaC_pos3, rpl16_pos3, rpl36_pos3, rps3_pos3                                                                                                                                                                                                                                                                                                                                                                                    |
| 5             | GTR + G    | 3rps12_pos3, 5rps12_pos2, atpB_pos1, atpI_pos1, clpP_pos2, infA_pos2, lhbA_pos2, ndhB_pos3, ndhI_pos1, ndhJ_pos1, ndhJ_pos2, petB_pos1, petB_pos2, petD_pos2, psaB_pos1, psbA_pos1, psbA_pos2, psbB_pos2, psbC_pos2, psbD_pos2, psbK_pos2, psbL_pos1, psbM_pos1, psbN_pos1, psbT_pos2, rpl23_pos3, rpl36_pos2, rpoB_pos1, rpoB_pos2, rpoC1_pos2, rps11_pos1, rps14_pos2, rps15_pos2, rps2_pos2, rps3_pos2, rps4_pos2, rps7_pos3, ycf2_pos1, ycf2_pos2, ycf2_pos3, ycf3_pos1 |
| 6             | GTR + G    | atpB_pos2, atpF_pos2, ccsA_pos1, ccsA_pos2, lhbA_pos1, ndhA_pos2, ndhD_pos1, ndhD_pos2, ndhG_pos1, ndhK_pos1, petD_pos1, petL_pos1, petL_pos3, psaB_pos2, psaI_pos1, psbB_pos1, psbD_pos1, psbE_pos2, psbF_pos2, psbF_pos3,                                                                                                                                                                                                                                                 |

|    |             |                                                                                                                                                                                                                                                                                                                                                                                                                                                                                                                                                                  |
|----|-------------|------------------------------------------------------------------------------------------------------------------------------------------------------------------------------------------------------------------------------------------------------------------------------------------------------------------------------------------------------------------------------------------------------------------------------------------------------------------------------------------------------------------------------------------------------------------|
| 7  | GTR + G     | psbJ_pos1, psbN_pos3, rpl16_pos2, rpl20_pos1, rpl36_pos1, rpoC2_pos2, rps8_pos2<br>5rps12_pos1, atpE_pos1, atpE_pos2, atpI_pos2, cemA_pos1, cemA_pos2, infA_pos1, ndhC_pos1, ndhE_pos1, ndhG_pos2, ndhH_pos1, ndhH_pos2, ndhI_pos2, ndhK_pos2, petA_pos1, petA_pos2, petL_pos2, psaA_pos1, psaA_pos2, psaC_pos1, psaJ_pos1, psaJ_pos2, psbC_pos1, psbL_pos3, psbN_pos2, rpl14_pos1, rpl2_pos3, rpl33_pos1, rpl33_pos2, rpoA_pos1, rpoA_pos2, rpoC1_pos1, rps11_pos2, rps14_pos1, rps18_pos1, rps18_pos2, rps19_pos1, rps19_pos2, rps2_pos1, rps4_pos1, ycf4_pos2 |
| 8  | GTR + G     | 3rps12_pos1, 3rps12_pos2, atpH_pos1, atpH_pos2, ndhB_pos1, ndhB_pos2, ndhC_pos2, ndhE_pos2, petG_pos1, petG_pos2, petN_pos1, petN_pos2, psbE_pos1, psbF_pos1, psbI_pos1, psbI_pos2, psbT_pos1, rpl14_pos2, rpl23_pos1, rpl23_pos2, rpl2_pos1, rpl2_pos2, rps7_pos1, rps7_pos2, rrn16, rrn23, rrn4_5, rrn5                                                                                                                                                                                                                                                        |
| 9  | GTR + G     | atpH_pos3, cemA_pos3, infA_pos3, ndhG_pos3, ndhI_pos3, petA_pos3, petB_pos3, psaA_pos3, psaB_pos3, psbB_pos3, psbC_pos3, psbI_pos3, psbM_pos3, psbT_pos3, rbcL_pos3, rpoC2_pos3, rps15_pos3, rps19_pos3, ycf4_pos3                                                                                                                                                                                                                                                                                                                                               |
| 10 | GTR + G     | ccsA_pos3, ndhD_pos3, ndhH_pos3, psbK_pos1, rpl22_pos3, rps16_pos3                                                                                                                                                                                                                                                                                                                                                                                                                                                                                               |
| 11 | GTR + G     | ndhA_pos3, psaJ_pos3, rpl32_pos3, rps11_pos3                                                                                                                                                                                                                                                                                                                                                                                                                                                                                                                     |
| 12 | GTR + I + G | ndhF_pos3                                                                                                                                                                                                                                                                                                                                                                                                                                                                                                                                                        |

|    |               |                  |
|----|---------------|------------------|
| c) |               |                  |
| 1  | JTT + G + F   | accD             |
| 2  | CPREV + I + G | atpA, psbC       |
| 3  | JTT + G       | atpB             |
| 4  | JTT + G       | atpE, clpP, ndhI |
| 5  | JTT + G       | atpF             |
| 6  | CPREV+G       | atpH             |
| 7  | JTT+G         | 5rps12, atpI     |
| 8  | JTT+G+F       | ccsA             |
| 9  | JTT+G+F       | cemA, ndhA       |
| 10 | JTT+G         | infA             |
| 11 | CPREV+G       | lhbA             |
| 12 | JTT+G+F       | matK             |
| 13 | JTT+G+F       | ndhB             |
| 14 | CPREV + G     | ndhC             |
| 15 | CPREV + G     | ndhD             |
| 16 | MTMAM+G       | ndhE             |
| 17 | JTT + G + F   | ndhF             |
| 18 | JTT + G       | ndhG             |
| 19 | JTT + I + G   | ndhH             |
| 20 | JTT + G       | ndhJ             |
| 21 | JTT + G       | ndhK             |
| 22 | JTT + G       | petA, rpoC1      |
| 23 | JTT + G       | petB             |
| 24 | JTT + G       | petD, psbH       |
| 25 | CPREV + G     | petG             |
| 26 | MTMAM+G       | petL             |
| 27 | MTMAM+G       | petN             |

|    |               |                                                                                                                                                                                                                                                                 |
|----|---------------|-----------------------------------------------------------------------------------------------------------------------------------------------------------------------------------------------------------------------------------------------------------------|
| 28 | CPREV + I + G | psaA                                                                                                                                                                                                                                                            |
| 29 | CPREV + I + G | psaB                                                                                                                                                                                                                                                            |
| 30 | JTT + I + G   | psaC                                                                                                                                                                                                                                                            |
| 31 | CPREV + G     | psaI                                                                                                                                                                                                                                                            |
| 32 | CPREV + G     | psaJ                                                                                                                                                                                                                                                            |
| 33 | CPREV + I + G | psbA                                                                                                                                                                                                                                                            |
| 34 | JTT + I + G   | psbB                                                                                                                                                                                                                                                            |
| 35 | CPREV + I + G | psbD                                                                                                                                                                                                                                                            |
| 36 | JTT + G       | psbE                                                                                                                                                                                                                                                            |
| 37 | JTT + G       | psbF, rps11                                                                                                                                                                                                                                                     |
| 38 | CPREV + G     | psbI                                                                                                                                                                                                                                                            |
| 39 | MTMAM+G       | psbJ                                                                                                                                                                                                                                                            |
| 40 | CPREV + G     | psbK                                                                                                                                                                                                                                                            |
| 41 | MTMAM+G       | psbL                                                                                                                                                                                                                                                            |
| 42 | CPREV + G     | psbM                                                                                                                                                                                                                                                            |
| 43 | MTMAM+G       | psbN                                                                                                                                                                                                                                                            |
| 44 | JTT + G       | psbT                                                                                                                                                                                                                                                            |
| 45 | LG + G        | rbcL                                                                                                                                                                                                                                                            |
| 46 | JTT + G       | rpl2                                                                                                                                                                                                                                                            |
| 47 | JTT + G       | rpl14                                                                                                                                                                                                                                                           |
| 48 | CPREV + G     | rpl16                                                                                                                                                                                                                                                           |
| 49 | JTT + G       | rpl20                                                                                                                                                                                                                                                           |
| 50 | JTT + G       | rpl22                                                                                                                                                                                                                                                           |
| 51 | JTT + G       | rpl23                                                                                                                                                                                                                                                           |
| 52 | JTT + G       | rpl32                                                                                                                                                                                                                                                           |
| 53 | JTT + G       | rpl33                                                                                                                                                                                                                                                           |
| 54 | CPREV + G     | rpl36                                                                                                                                                                                                                                                           |
| 55 | JTT + G       | rpoA                                                                                                                                                                                                                                                            |
| 56 | JTT + G       | rpoB                                                                                                                                                                                                                                                            |
| 57 | JTT + G + F   | rpoC2                                                                                                                                                                                                                                                           |
| 58 | JTT + G       | rps2                                                                                                                                                                                                                                                            |
| 59 | JTT + G       | rps3                                                                                                                                                                                                                                                            |
| 60 | JTT + G       | rps4                                                                                                                                                                                                                                                            |
| 61 | JTT + G       | rps7                                                                                                                                                                                                                                                            |
| 62 | CPREV + G     | rps8                                                                                                                                                                                                                                                            |
| 63 | CPREV + G     | 3rps12                                                                                                                                                                                                                                                          |
| 64 | JTT + G       | rps14                                                                                                                                                                                                                                                           |
| 65 | JTT + G       | rps15                                                                                                                                                                                                                                                           |
| 66 | JTT + G       | rps16                                                                                                                                                                                                                                                           |
| 67 | JTT + G + F   | rps18                                                                                                                                                                                                                                                           |
| 68 | JTT + G       | rps19                                                                                                                                                                                                                                                           |
| 69 | JTT + G + F   | ycf2                                                                                                                                                                                                                                                            |
| 70 | JTT + G       | ycf3                                                                                                                                                                                                                                                            |
| 71 | CPREV + G     | ycf4                                                                                                                                                                                                                                                            |
| d) |               |                                                                                                                                                                                                                                                                 |
| 1  | GTR + G       | 5rps12_pos3, accD_pos1, accD_pos2, clpP_pos3, ndhA_pos1, psaI_pos3, psbE_pos3, psbH_pos2, psbJ_pos1, psbJ_pos2, psbJ_pos3, rbcL_pos1, rbcL_pos2, rpl16_pos1, rpl22_pos1, rpl22_pos2, rpl33_pos1, rpl33_pos2, rpoC2_pos1, rps14_pos3, rps4_pos3, ycf3_pos2       |
| 2  | GTR + G       | accD_pos3, atpB_pos3, atpE_pos3, atpF_pos3, atpI_pos3, matK_pos1, ndhC_pos3, ndhJ_pos3, ndhK_pos3, petN_pos3, psaI_pos2, psbA_pos3, psbD_pos3, psbH_pos3, psbK_pos3, rpl14_pos3, rpl32_pos2, rpl33_pos3, rpoA_pos3, rpoB_pos3, rpoC1_pos3, rps2_pos3, rps8_pos3 |

|    |             |                                                                                                                                                                                                                                                                                                                                                                                                                                                                                                                                                                                                                                                                                                           |
|----|-------------|-----------------------------------------------------------------------------------------------------------------------------------------------------------------------------------------------------------------------------------------------------------------------------------------------------------------------------------------------------------------------------------------------------------------------------------------------------------------------------------------------------------------------------------------------------------------------------------------------------------------------------------------------------------------------------------------------------------|
| 3  | GTR + G     | atpA_pos1, atpB_pos2, atpF_pos1, ccsA_pos1, ndhG_pos1, ndhH_pos1, psaC_pos2, psaI_pos1, psbB_pos1, psbH_pos1, psbM_pos2, rpl16_pos2, rpl20_pos1, rpoA_pos1, rps11_pos1, rps15_pos1, rps3_pos1, rps8_pos1, ycf4_pos1                                                                                                                                                                                                                                                                                                                                                                                                                                                                                       |
| 4  | GTR + G     | 5rps12_pos1, atpA_pos2, atpE_pos1, atpE_pos2, atpF_pos2, atpI_pos2, ccsA_pos2, cemA_pos1, cemA_pos2, clpP_pos1, clpP_pos2, infA_pos1, infA_pos2, lhbA_pos1, ndhA_pos2, ndhC_pos1, ndhD_pos1, ndhD_pos2, ndhE_pos1, ndhG_pos2, ndhH_pos2, ndhI_pos2, ndhK_pos1, ndhK_pos2, petA_pos1, petA_pos2, petD_pos1, petL_pos1, petL_pos2, petL_pos3, psaA_pos1, psaB_pos2, psaC_pos1, psaJ_pos1, psbA_pos2, psbC_pos1, psbD_pos1, psbE_pos2, psbF_pos2, psbF_pos3, psbL_pos3, psbN_pos3, rpl20_pos2, rpl2_pos3, rpl36_pos1, rpoA_pos2, rpoC1_pos1, rpoC2_pos2, rps11_pos2, rps14_pos1, rps18_pos1, rps18_pos2, rps19_pos1, rps19_pos2, rps2_pos1, rps2_pos2, rps3_pos2, rps4_pos1, rps4_pos2, rps8_pos2, ycf4_pos2 |
| 5  | GTR + G     | atpA_pos3, matK_pos3, ndhE_pos3, petD_pos3, psaC_pos3, rpl16_pos3, rpl36_pos3, rps3_pos3                                                                                                                                                                                                                                                                                                                                                                                                                                                                                                                                                                                                                  |
| 6  | GTR + G     | 3rps12_pos3, 5rps12_pos2, atpB_pos1, atpI_pos1, lhbA_pos2, ndhB_pos3, ndhE_pos2, ndhI_pos1, ndhJ_pos1, ndhJ_pos2, petB_pos1, petB_pos2, petD_pos2, petG_pos1, psaB_pos1, psaJ_pos2, psbA_pos1, psbC_pos2, psbD_pos2, psbK_pos2, psbL_pos1, psbM_pos1, psbN_pos1, psbT_pos1, psbT_pos2, rpl14_pos1, rpl23_pos3, rpl2_pos1, rpl36_pos2, rpoB_pos1, rpoB_pos2, rpoC1_pos2, rps14_pos2, rps15_pos2, rps7_pos1, rps7_pos3, ycf2_pos1, ycf2_pos2, ycf2_pos3, ycf3_pos1                                                                                                                                                                                                                                          |
| 7  | GTR + G     | 3rps12_pos1, 3rps12_pos2, atpH_pos1, atpH_pos2, ndhB_pos1, ndhB_pos2, ndhC_pos2, petG_pos2, petN_pos1, petN_pos2, psaA_pos2, psbB_pos2, psbE_pos1, psbF_pos1, psbI_pos1, psbI_pos2, psbN_pos2, rpl14_pos2, rpl23_pos1, rpl23_pos2, rpl2_pos2, rps16_pos1, rps7_pos2, rrn16, rrn23, rrn4_5, rrn5                                                                                                                                                                                                                                                                                                                                                                                                           |
| 8  | GTR + G     | atpH_pos3, cemA_pos3, infA_pos3, ndhG_pos3, ndhI_pos3, petA_pos3, petB_pos3, psaA_pos3, psaB_pos3, psbB_pos3, psbC_pos3, psbI_pos3, psbM_pos3, psbT_pos3, rbcL_pos3, rpoC2_pos3, rps15_pos3, rps19_pos3, ycf4_pos3                                                                                                                                                                                                                                                                                                                                                                                                                                                                                        |
| 9  | GTR + G     | ccsA_pos3, ndhA_pos3, ndhD_pos3, ndhH_pos3, psaJ_pos3, psbK_pos1, rpl22_pos3, rpl32_pos3, rps11_pos3, rps16_pos3                                                                                                                                                                                                                                                                                                                                                                                                                                                                                                                                                                                          |
| 10 | GTR + G     | lhbA_pos3, matK_pos2, ndhF_pos1, ndhF_pos2, petG_pos3, psbL_pos2, rpl20_pos3, rpl32_pos1, rps16_pos2, rps18_pos3, ycf3_pos3                                                                                                                                                                                                                                                                                                                                                                                                                                                                                                                                                                               |
| 11 | GTR + I + G | ndhF_pos3                                                                                                                                                                                                                                                                                                                                                                                                                                                                                                                                                                                                                                                                                                 |

Supplementary Table S3. Log likelihoods of branch models for the 18 genes retained in the *Sciaphila* plastome (note that the trans-spliced exons of *rps12* are treated operationally as two genes below; see text for further details).

| Gene             | Model                                                            | lnL <sup>a</sup> | LRT <sup>b</sup> | <i>P/P</i> -corrected <sup>c</sup> |
|------------------|------------------------------------------------------------------|------------------|------------------|------------------------------------|
| 3'- <i>rps12</i> | M0: $\omega_{\text{MHT}} = \omega_{\text{green}} = 0.149$        | -610.263         |                  |                                    |
|                  | M1: $\omega_{\text{MHT}} = 0.202, \omega_{\text{green}} = 0.115$ | -609.869         | 0.789            | --/--                              |
| 5'- <i>rps12</i> | M0: $\omega_{\text{MHT}} = \omega_{\text{green}} = 0.150$        | -506.460         |                  |                                    |
|                  | M1: $\omega_{\text{MHT}} = 0.312, \omega_{\text{green}} = 0.115$ | -506.460         | 2.672            | --/--                              |
| <i>accD</i>      | M0: $\omega_{\text{MHT}} = \omega_{\text{green}} = 0.309$        | -8167.290        |                  |                                    |
|                  | M1: $\omega_{\text{MHT}} = 0.255, \omega_{\text{green}} = 0.316$ | -8166.681        | 1.218            | --/--                              |
| <i>clpP</i>      | M0: $\omega_{\text{MHT}} = \omega_{\text{green}} = 0.174$        | -2868.960        |                  |                                    |
|                  | M1: $\omega_{\text{MHT}} = 0.288, \omega_{\text{green}} = 0.154$ | -2866.248        | 5.423            | * / *                              |
| <i>matK</i>      | M0: $\omega_{\text{MHT}} = \omega_{\text{green}} = 0.367$        | -12771.087       |                  |                                    |
|                  | M1: $\omega_{\text{MHT}} = 0.491, \omega_{\text{green}} = 0.358$ | -12769.319       | 3.536            | --/--                              |
| <i>rpl2</i>      | M0: $\omega_{\text{MHT}} = \omega_{\text{green}} = 0.252$        | -2303.569        |                  |                                    |
|                  | M1: $\omega_{\text{MHT}} = 0.280, \omega_{\text{green}} = 0.235$ | -2303.389        | 0.360            | --/--                              |
| <i>rpl14</i>     | M0: $\omega_{\text{MHT}} = \omega_{\text{green}} = 0.111$        | -1630.594        |                  |                                    |
|                  | M1: $\omega_{\text{MHT}} = 0.240, \omega_{\text{green}} = 0.096$ | -1627.974        | 5.240            | * / *                              |
| <i>rpl16</i>     | M0: $\omega_{\text{MHT}} = \omega_{\text{green}} = 0.169$        | -2310.496        |                  |                                    |
|                  | M1: $\omega_{\text{MHT}} = 0.093, \omega_{\text{green}} = 0.185$ | -2308.459        | 4.075            | * / --                             |
| <i>rpl20</i>     | M0: $\omega_{\text{MHT}} = \omega_{\text{green}} = 0.353$        | -1930.838        |                  |                                    |
|                  | M1: $\omega_{\text{MHT}} = 0.313, \omega_{\text{green}} = 0.360$ | -1930.759        | 0.158            | --/--                              |
| <i>rpl36</i>     | M0: $\omega_{\text{MHT}} = \omega_{\text{green}} = 0.103$        | -522.304         |                  |                                    |
|                  | M1: $\omega_{\text{MHT}} = 0.100, \omega_{\text{green}} = 0.103$ | -522.303         | 0.001            | --/--                              |
| <i>rps2</i>      | M0: $\omega_{\text{MHT}} = \omega_{\text{green}} = 0.183$        | -3730.279        |                  |                                    |
|                  | M1: $\omega_{\text{MHT}} = 0.258, \omega_{\text{green}} = 0.171$ | -3728.948        | 2.663            | --/--                              |
| <i>rps3</i>      | M0: $\omega_{\text{MHT}} = \omega_{\text{green}} = 0.178$        | -3847.162        |                  |                                    |
|                  | M1: $\omega_{\text{MHT}} = 0.224, \omega_{\text{green}} = 0.173$ | -3846.696        | 0.931            | --/--                              |
| <i>rps4</i>      | M0: $\omega_{\text{MHT}} = \omega_{\text{green}} = 0.174$        | -3056.894        |                  |                                    |
|                  | M1: $\omega_{\text{MHT}} = 0.211, \omega_{\text{green}} = 0.168$ | -3056.556        | 0.677            | --/--                              |
| <i>rps7</i>      | M0: $\omega_{\text{MHT}} = \omega_{\text{green}} = 0.330$        | -1147.401        |                  |                                    |
|                  | M1: $\omega_{\text{MHT}} = 0.611, \omega_{\text{green}} = 0.203$ | -1144.219        | 6.364            | * / *                              |
| <i>rps8</i>      | M0: $\omega_{\text{MHT}} = \omega_{\text{green}} = 0.259$        | -2262.744        |                  |                                    |
|                  | M1: $\omega_{\text{MHT}} = 0.403, \omega_{\text{green}} = 0.244$ | -2261.666        | 2.156            | --/--                              |
| <i>rps11</i>     | M0: $\omega_{\text{MHT}} = \omega_{\text{green}} = 0.097$        | -2310.140        |                  |                                    |
|                  | M1: $\omega_{\text{MHT}} = 0.129, \omega_{\text{green}} = 0.093$ | -2309.673        | 0.933            | --/--                              |
| <i>rps14</i>     | M0: $\omega_{\text{MHT}} = \omega_{\text{green}} = 0.218$        | -1449.355        |                  |                                    |
|                  | M1: $\omega_{\text{MHT}} = 0.138, \omega_{\text{green}} = 0.233$ | -1448.617        | 1.400            | --/--                              |
| <i>rps18</i>     | M0: $\omega_{\text{MHT}} = \omega_{\text{green}} = 0.214$        | -1416.231        |                  |                                    |
|                  | M1: $\omega_{\text{MHT}} = 0.192, \omega_{\text{green}} = 0.217$ | -1416.198        | 0.065            | --/--                              |
| <i>rps19</i>     | M0: $\omega_{\text{MHT}} = \omega_{\text{green}} = 0.160$        | -1249.963        |                  |                                    |
|                  | M1: $\omega_{\text{MHT}} = 0.111, \omega_{\text{green}} = 0.171$ | -1249.468        | 0.320            | --/--                              |

Abbreviations for  $\omega$  ratios:  $\omega_{\text{MHT}}$  = *Sciaphila* and  $\omega_{\text{green}}$  = green outgroups.

<sup>a</sup> Log likelihood of the data for the model.

<sup>b</sup> Log likelihood ratio test statistic  $-2(\ln L \text{ M0} - \ln L \text{ M1})$  to evaluate differences in model fit.

<sup>c</sup> *P*-values for uncorrected/Bonferroni corrected  $\chi^2$  tests, where \* =  $P < 0.05$  and dashes (--) indicates not significant.

Supplementary Table S4. Likelihoods of branch-site models for the 18 genes retained in the *Sciaphila* plastome. “Staggered” refers to analyses performed on a realigned matrix for *accD*, *rpl20* and *rps18* (note that the trans-spliced exons of *rps12* are treated operationally as two genes below; see text for further details).

| Gene             | LRT <sup>a</sup> | <i>P/P</i> corrected <sup>b</sup> | LRT<br>(staggered) | <i>P/P</i> -corrected<br>(staggered) |
|------------------|------------------|-----------------------------------|--------------------|--------------------------------------|
| 3'- <i>rps12</i> | 0                | --/--                             |                    |                                      |
| 5'- <i>rps12</i> | 1.259            | --/--                             |                    |                                      |
| <i>accD</i>      | 18.740           | *** / ***                         | 2.679              | --/--                                |
| <i>clpP</i>      | 0                | --/--                             |                    |                                      |
| <i>matK</i>      | 2.095            | --/--                             |                    |                                      |
| <i>rpl2</i>      | 0                | --/--                             |                    |                                      |
| <i>rpl14</i>     | 0.004            | --/--                             |                    |                                      |
| <i>rpl16</i>     | 0                | --/--                             |                    |                                      |
| <i>rpl20</i>     | 10.480           | ** / **                           | 0                  | --/--                                |
| <i>rpl36</i>     | 0                | --/--                             |                    |                                      |
| <i>rps2</i>      | 0                | --/--                             |                    |                                      |
| <i>rps3</i>      | 0                | --/--                             |                    |                                      |
| <i>rps4</i>      | 0.207            | --/--                             |                    |                                      |
| <i>rps7</i>      | 0.124            | --/--                             |                    |                                      |
| <i>rps8</i>      | 0                | --/--                             |                    |                                      |
| <i>rps11</i>     | 0                | --/--                             |                    |                                      |
| <i>rps14</i>     | 0                | --/--                             |                    |                                      |
| <i>rps18</i>     | 3.887            | * / --                            | 0                  | --/--                                |
| <i>rps19</i>     | 0                | --/--                             |                    |                                      |

<sup>a</sup> Log likelihood ratio test statistic  $-2(\ln L_{H0} - \ln L_{H1})$  to evaluate differences in model fit.

<sup>b</sup> *P*-values for uncorrected/Bonferroni corrected  $\chi^2$  tests, where \* =  $P < 0.05$ , \*\* =  $P < 0.01$ , \*\*\* =  $P < 0.001$  and dashes (--) indicates not significant.
