# Supplementary figures and images for: The Highly Reduced Plastome of Mycoheterotrophic Sciaphila (Triuridaceae) Is Colinear with Its Green Relatives and Is under Strong Purifying Selection
Source: PubMed Central journal article supplement — Genome Biol Evol. 2015 Jun 13;7(8):2220–36. doi: 10.1093/gbe/evv134 (PMC4558852; doi:10.1093/gbe/evv134), 2015-06-13

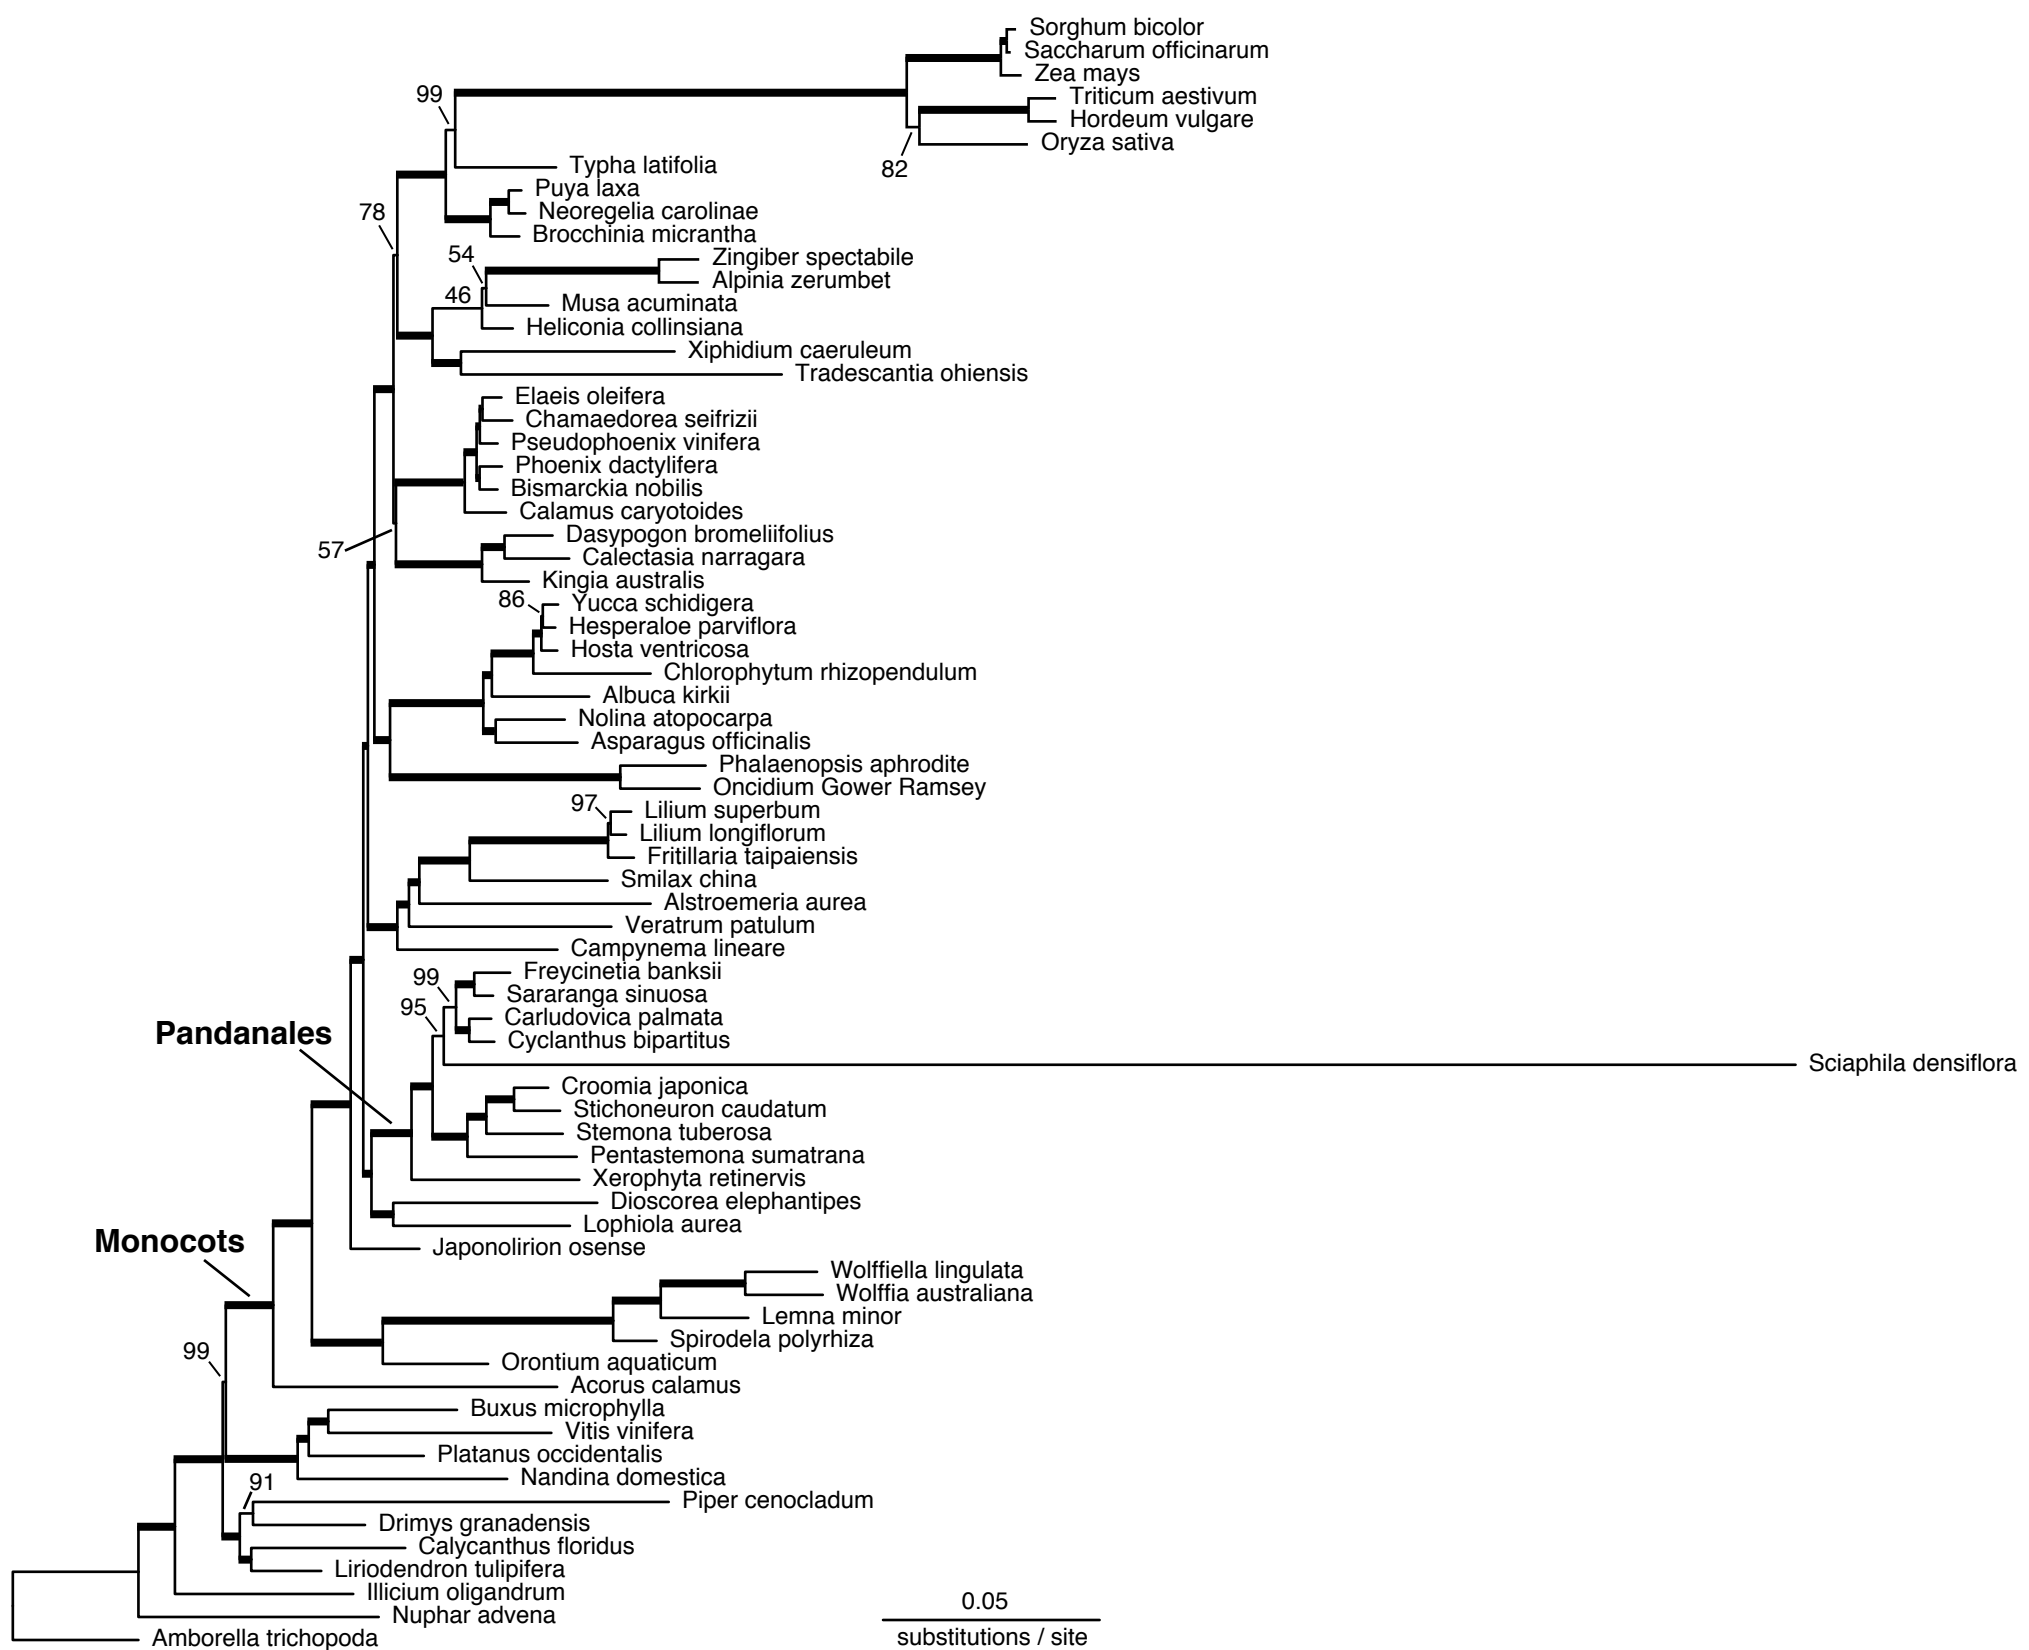

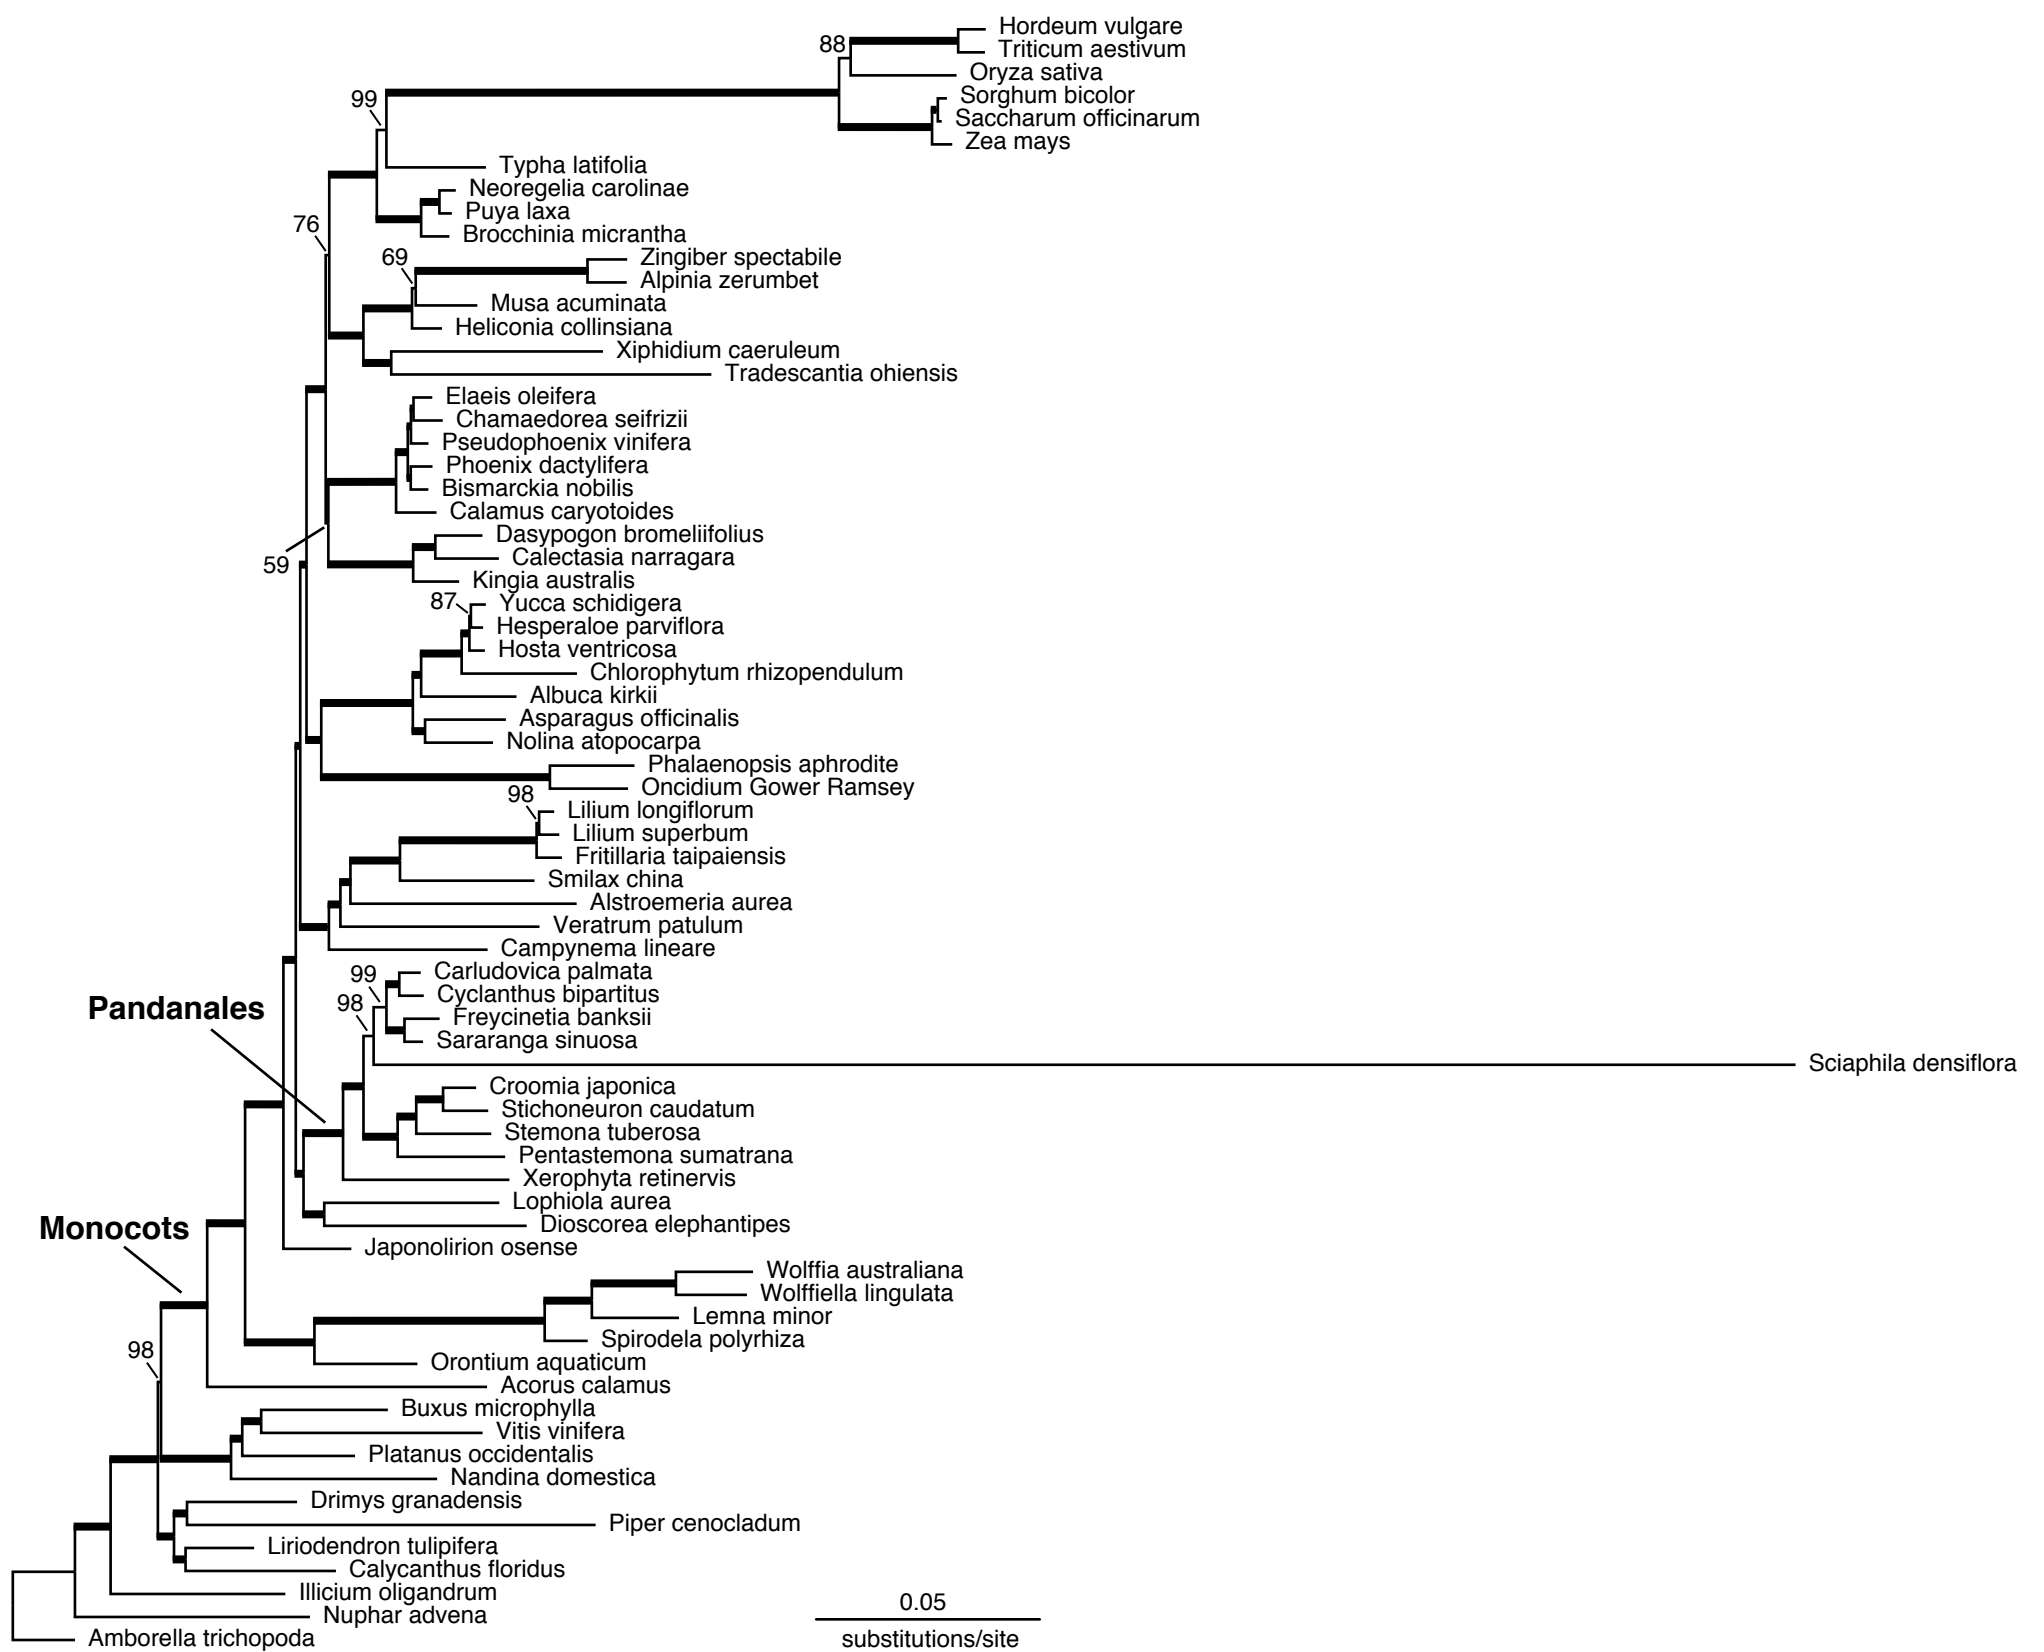

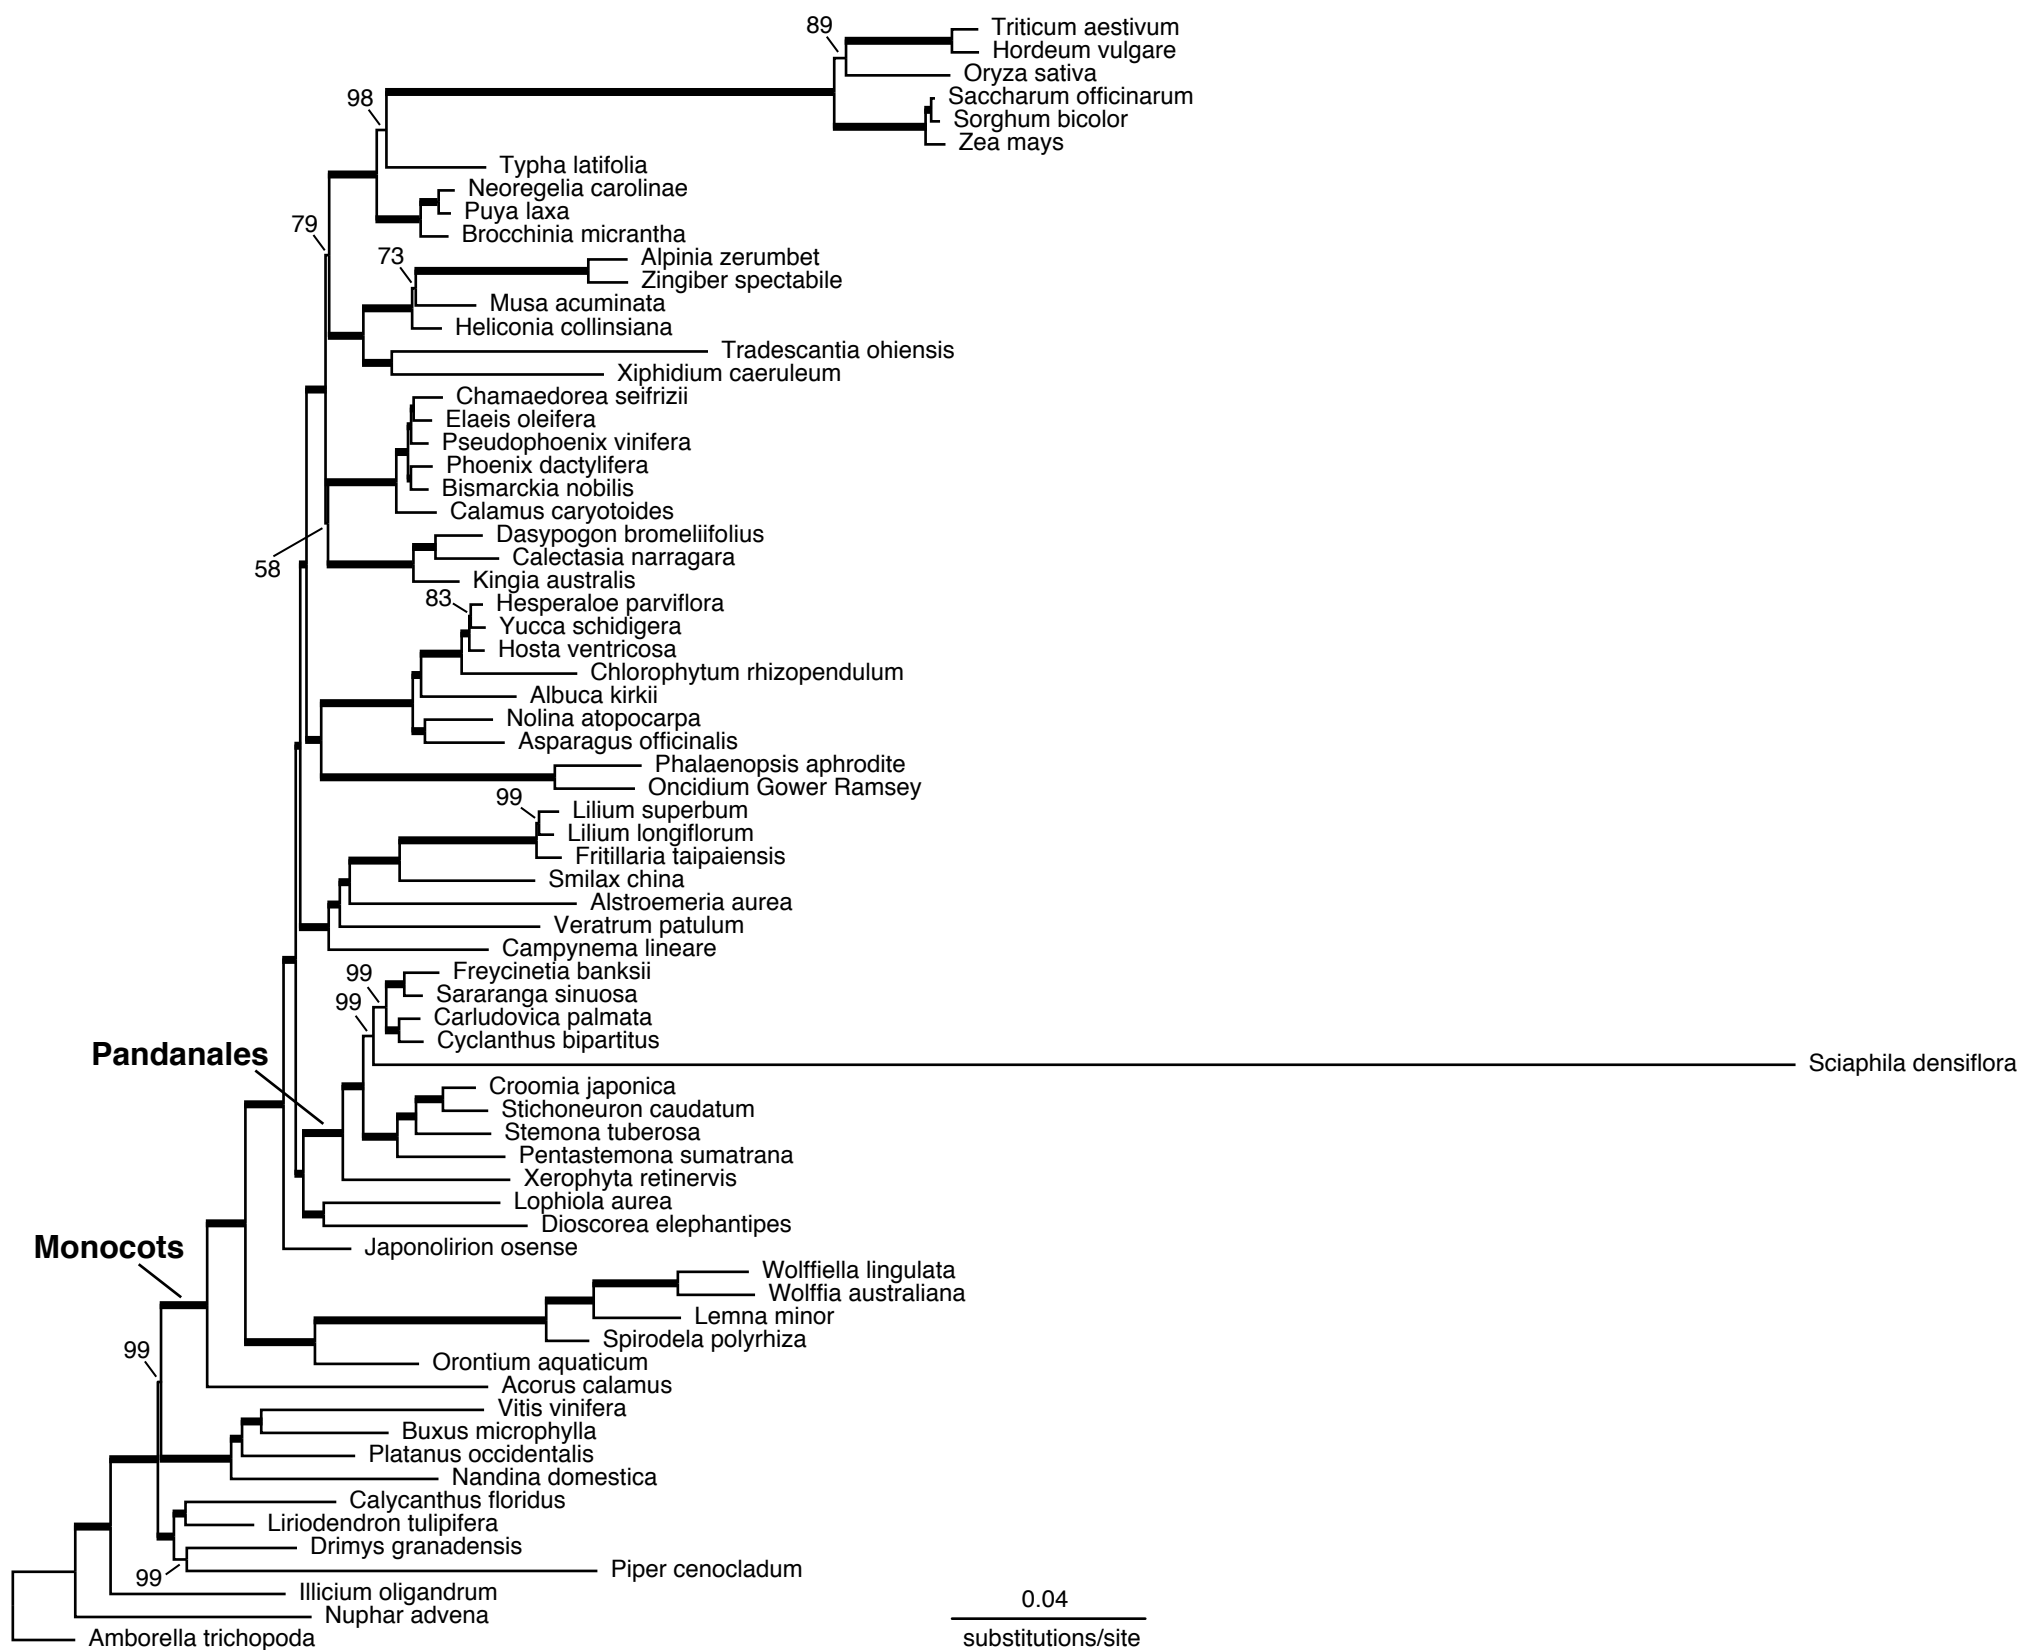

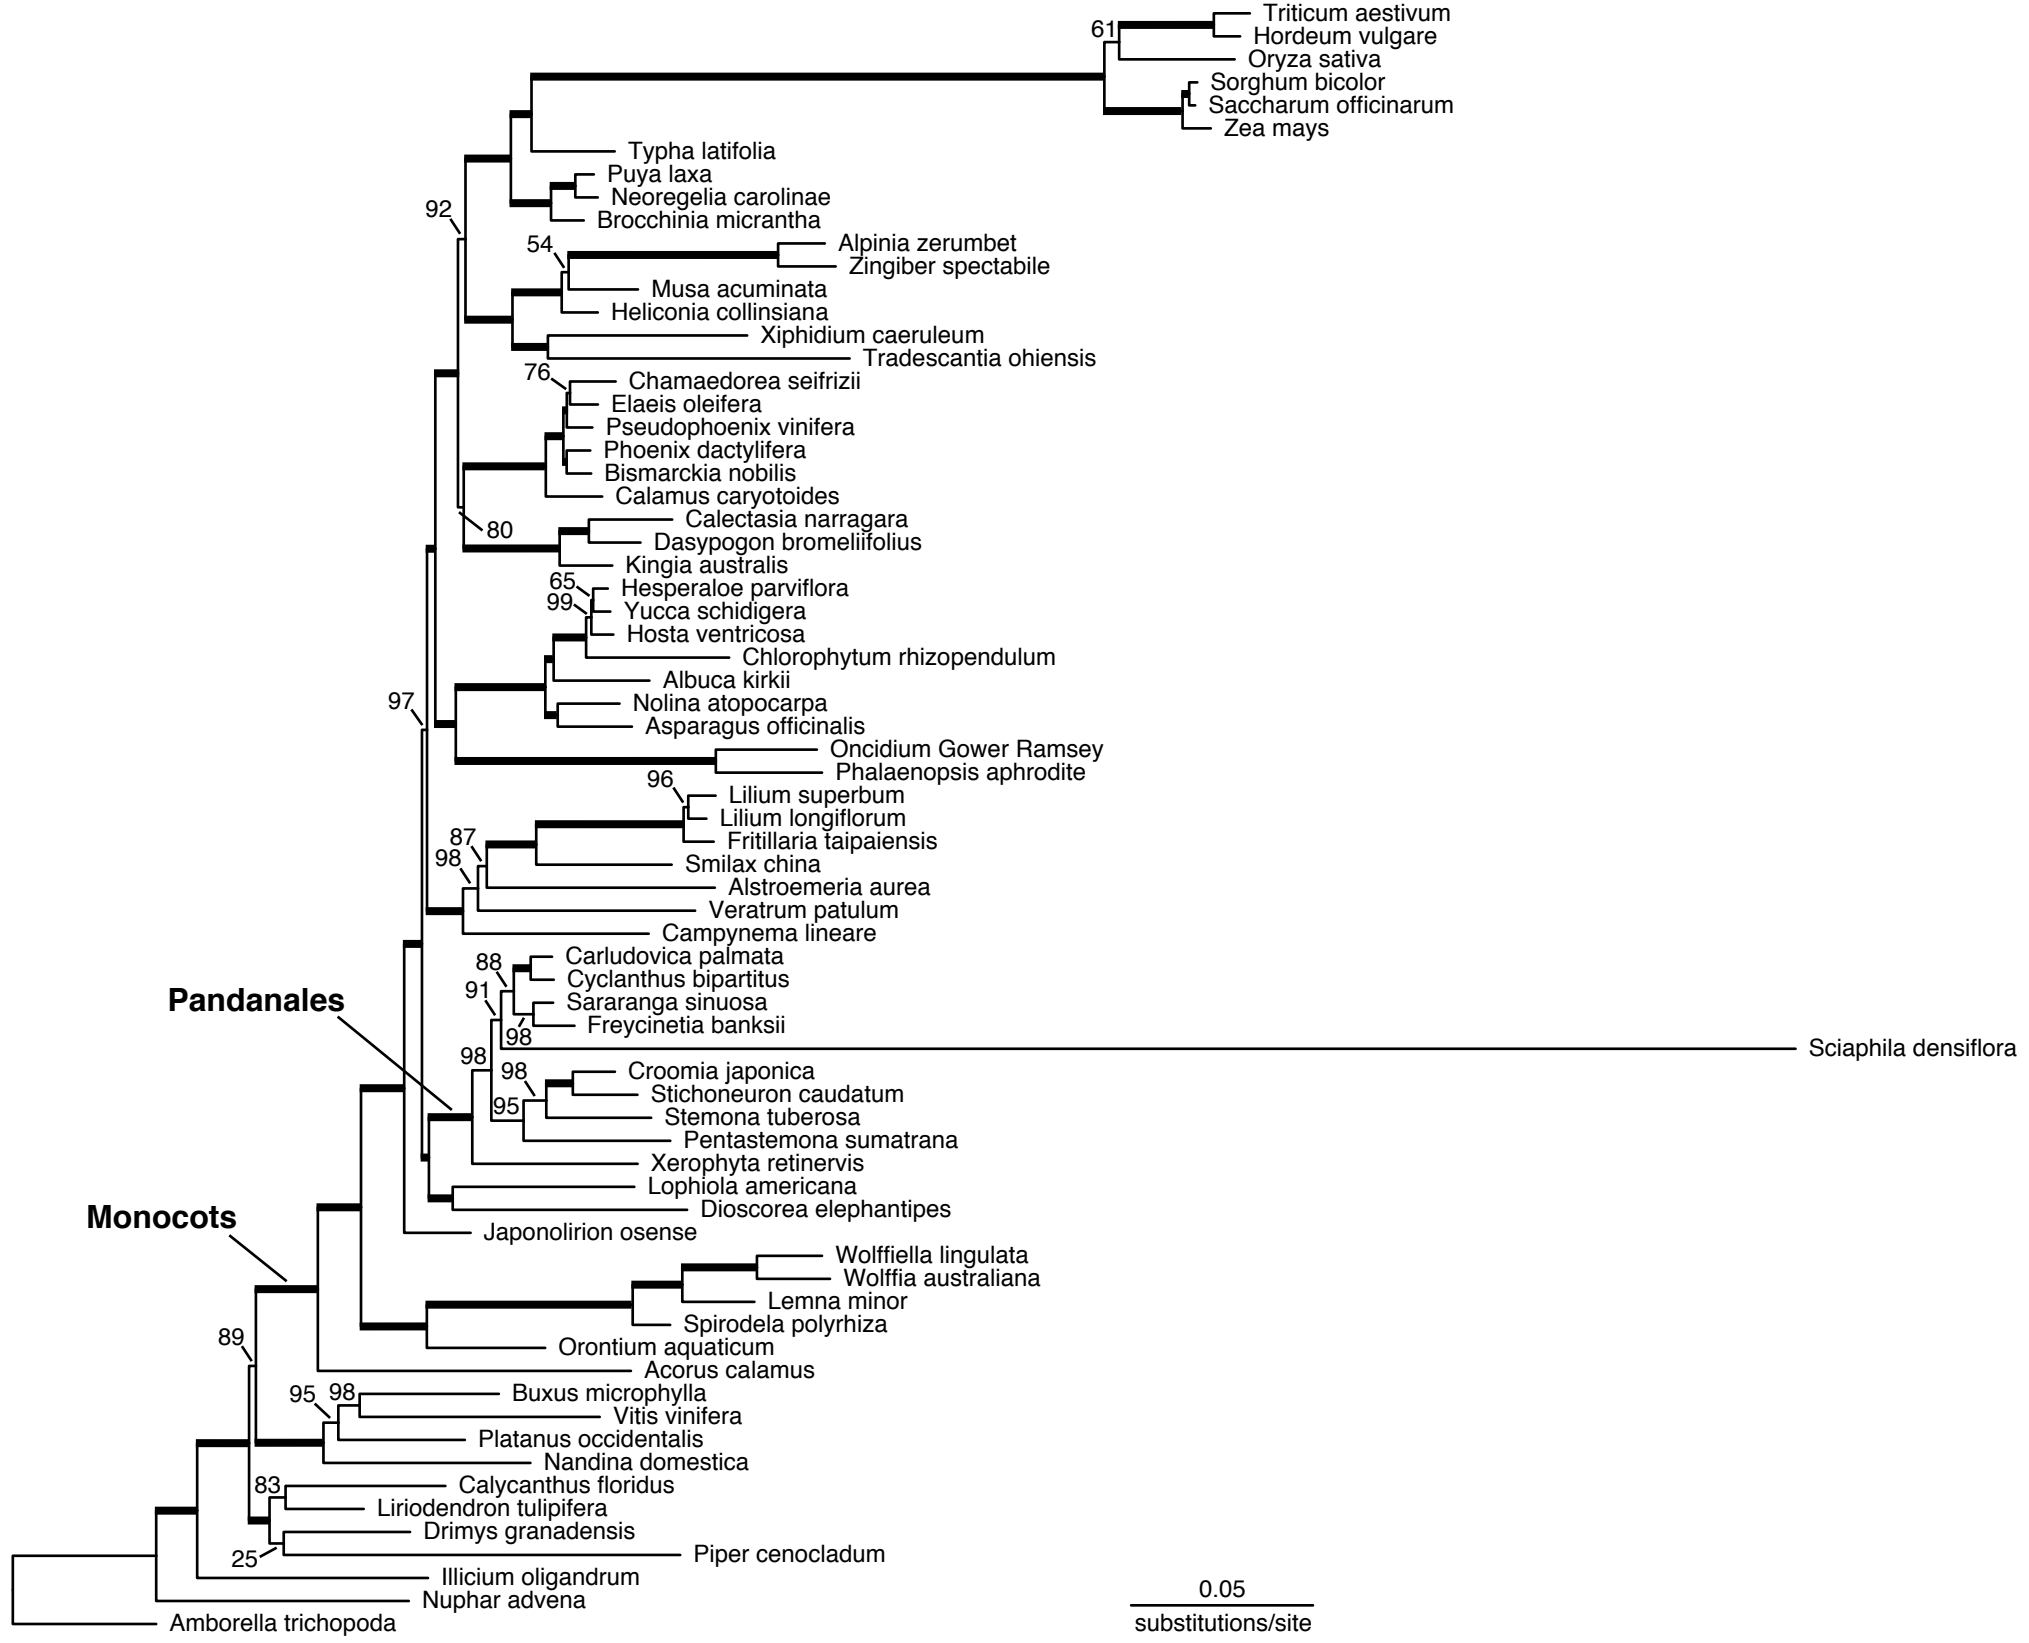

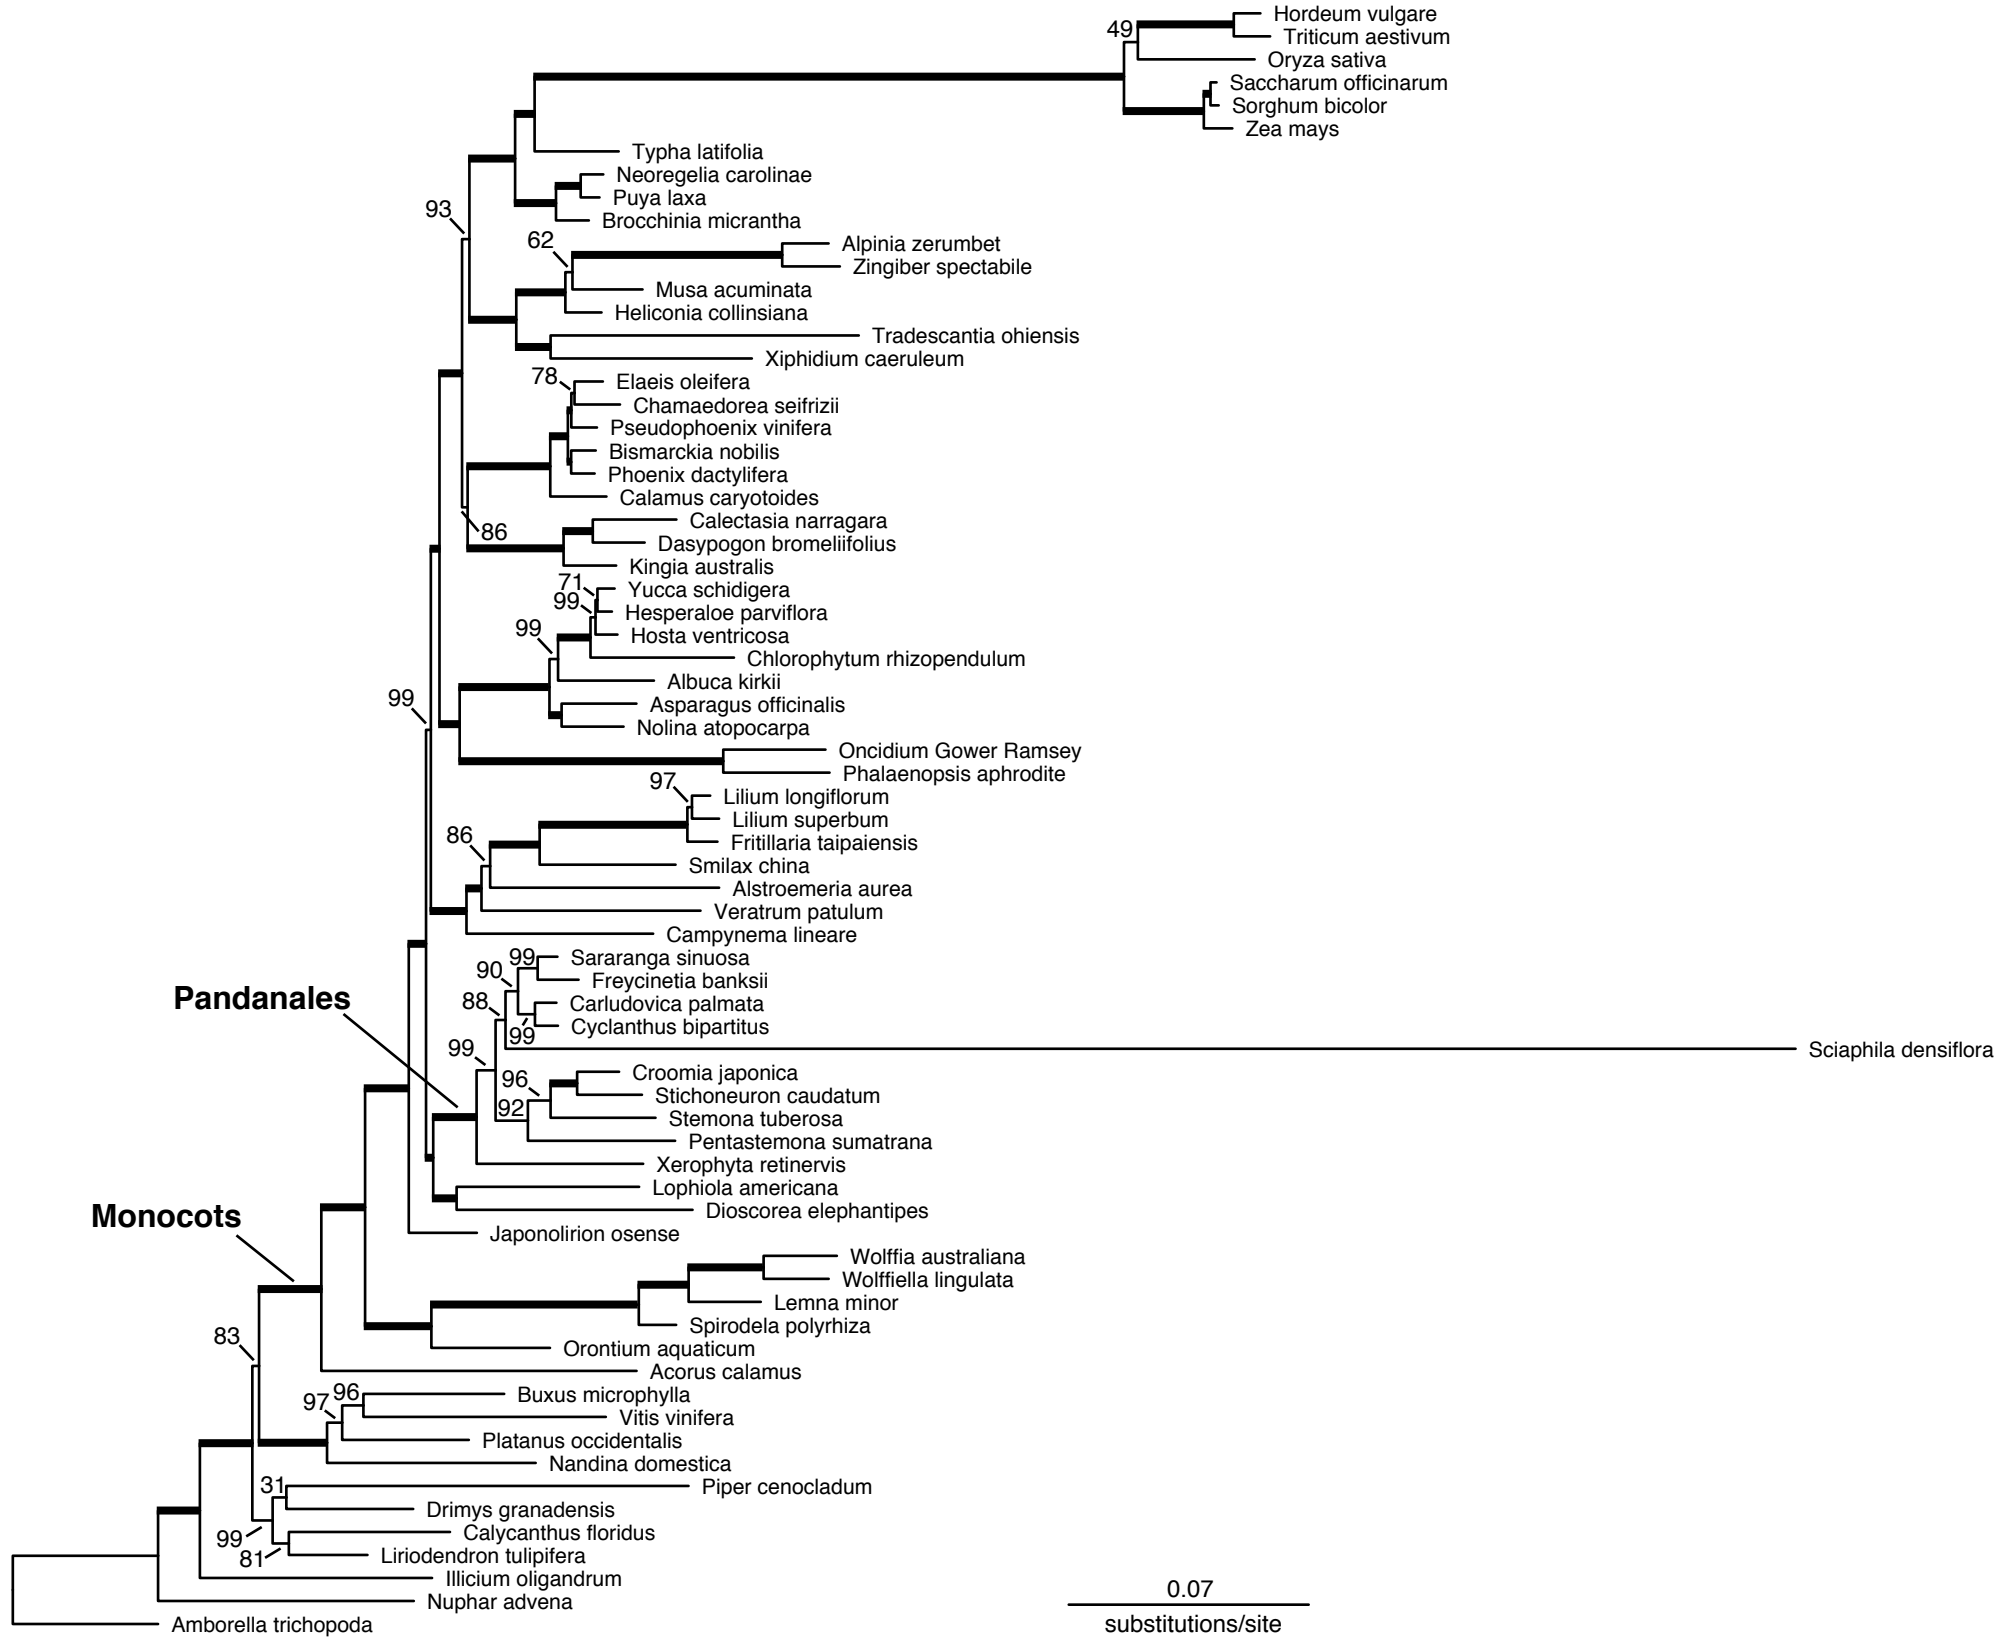

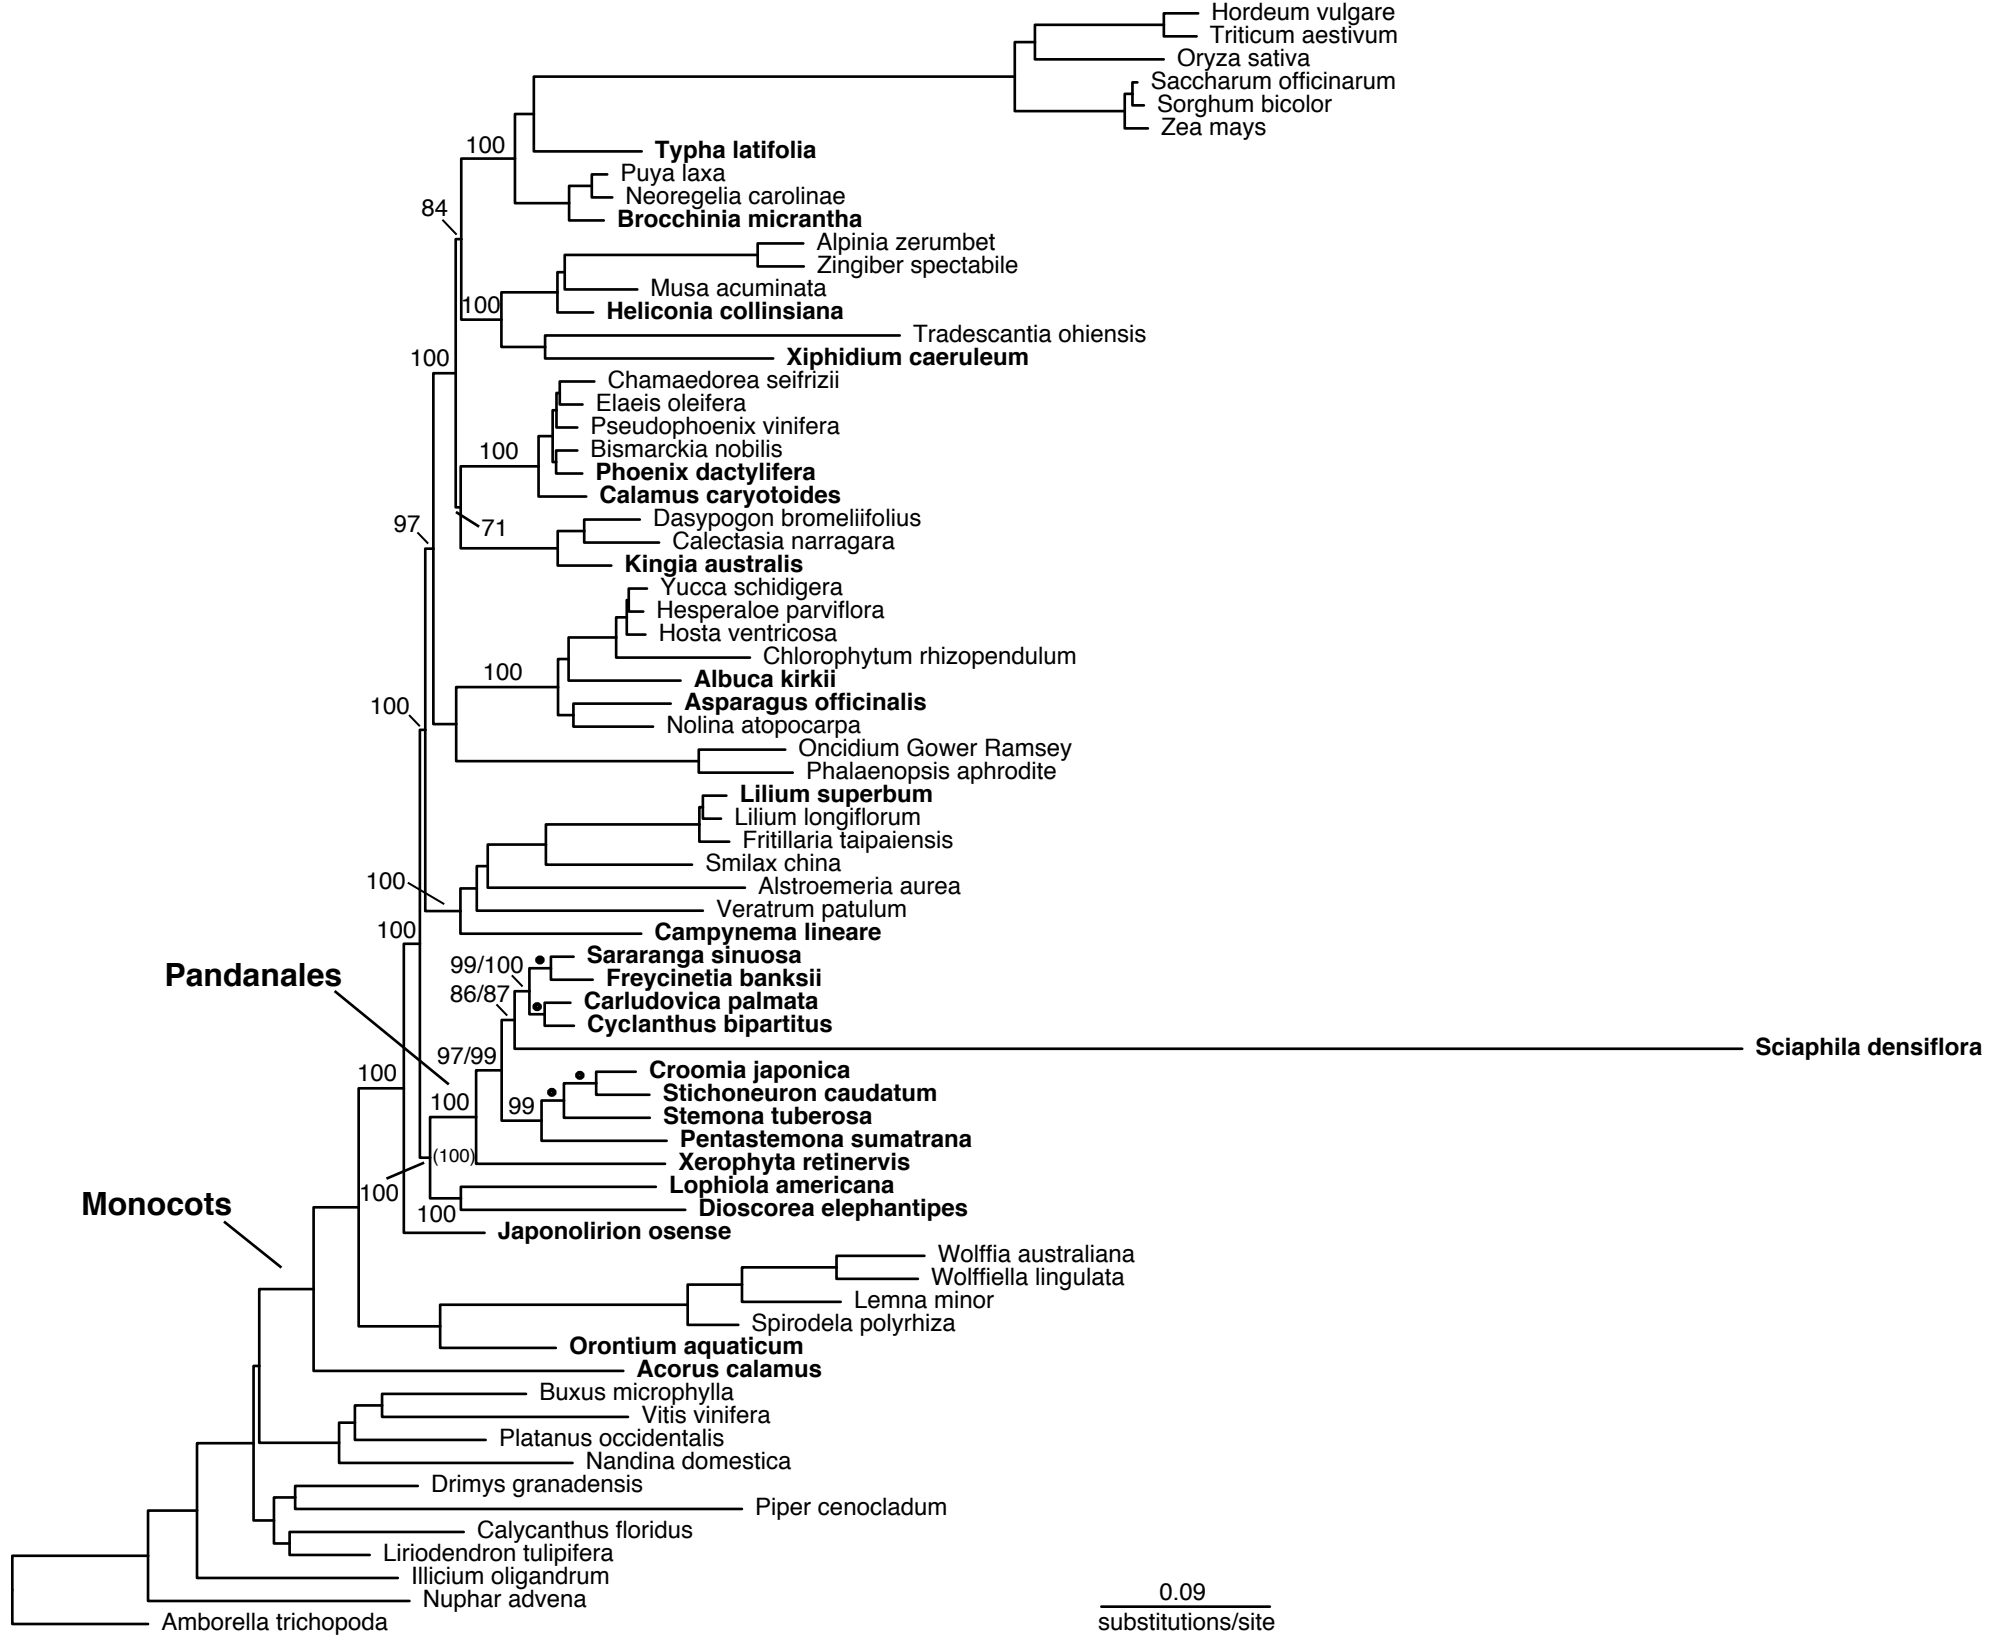

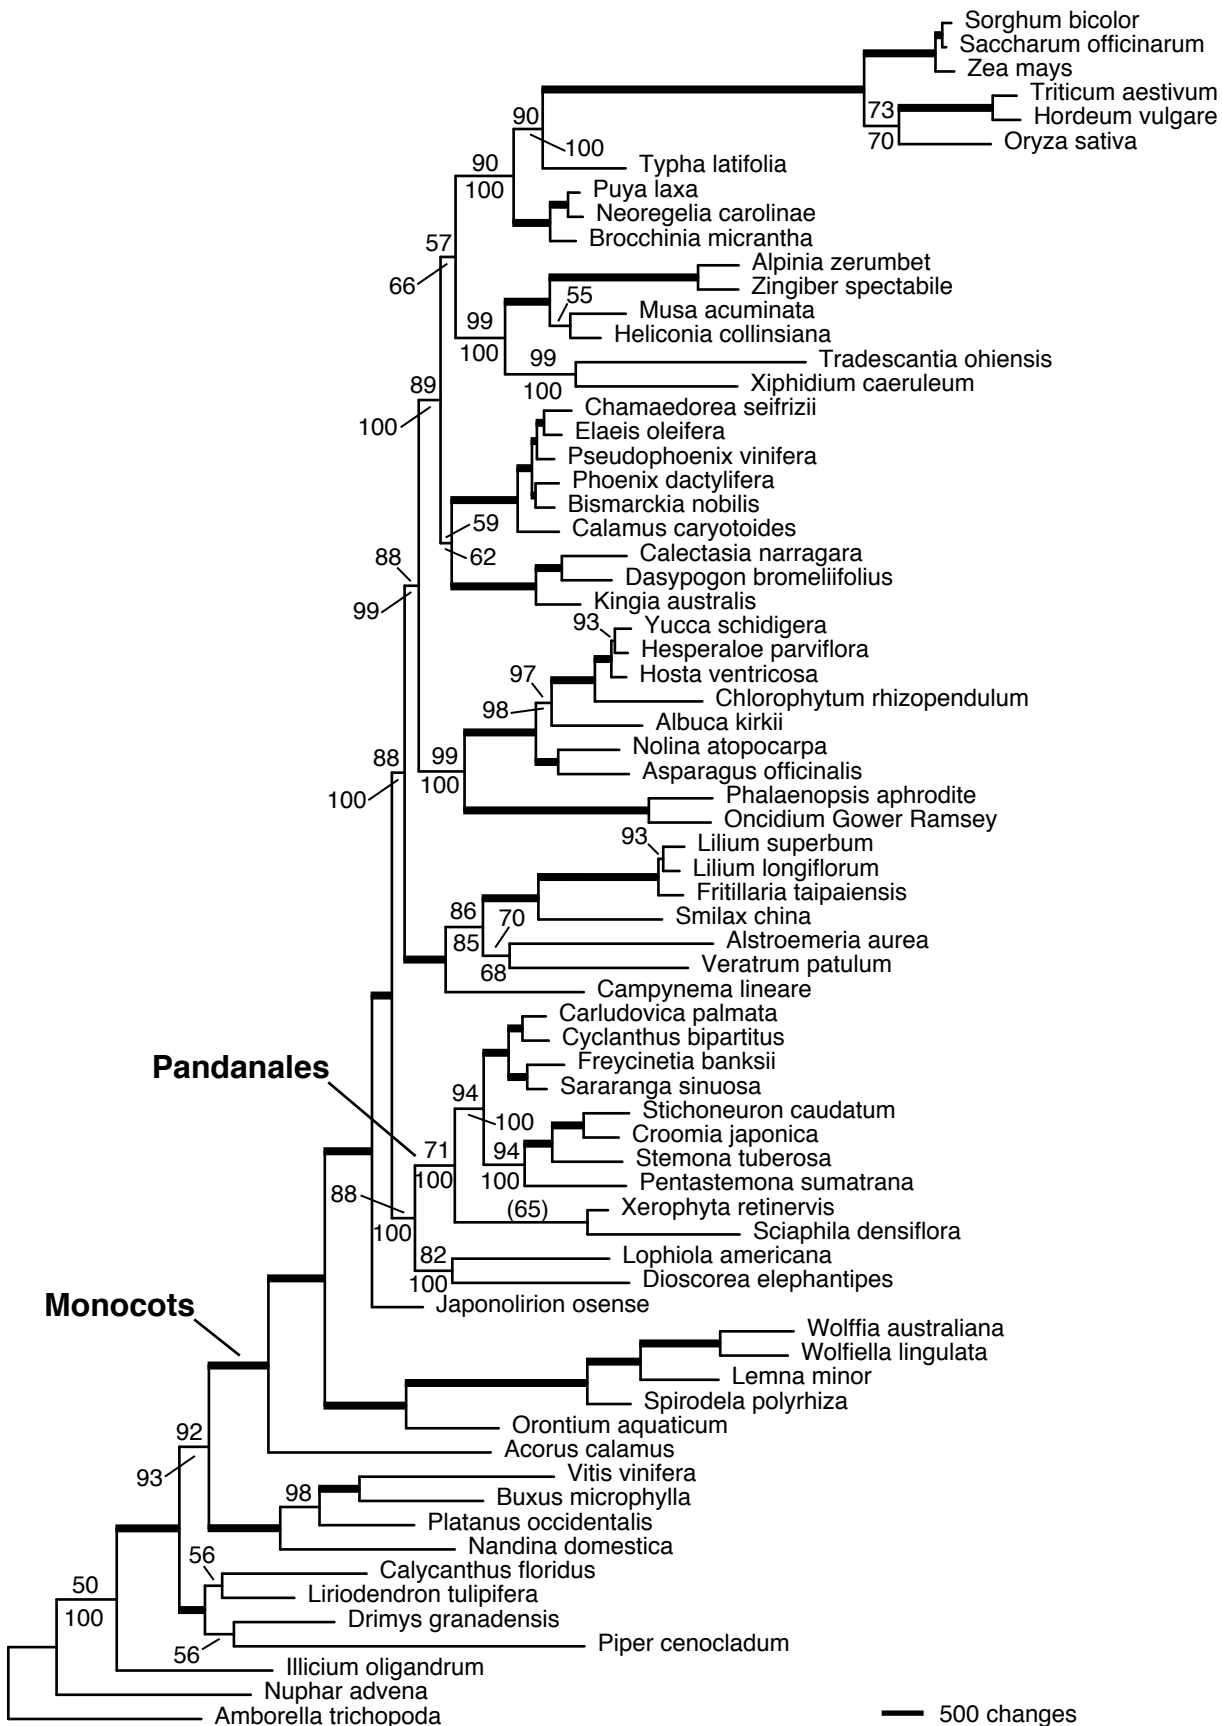

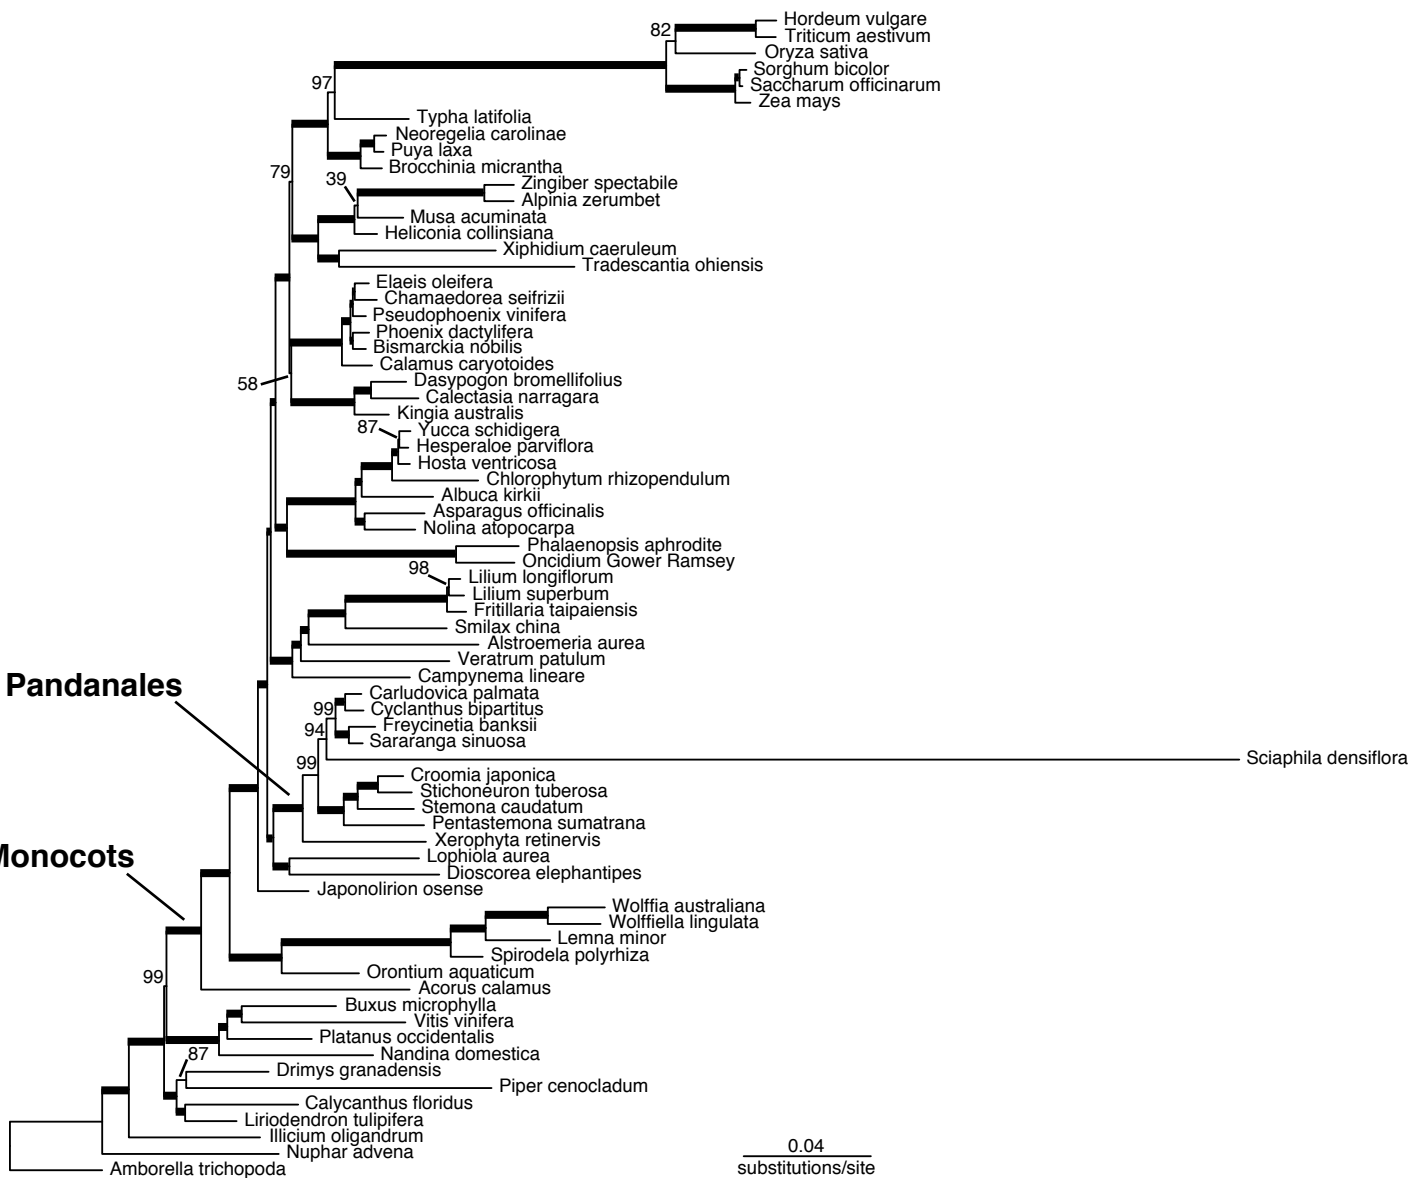



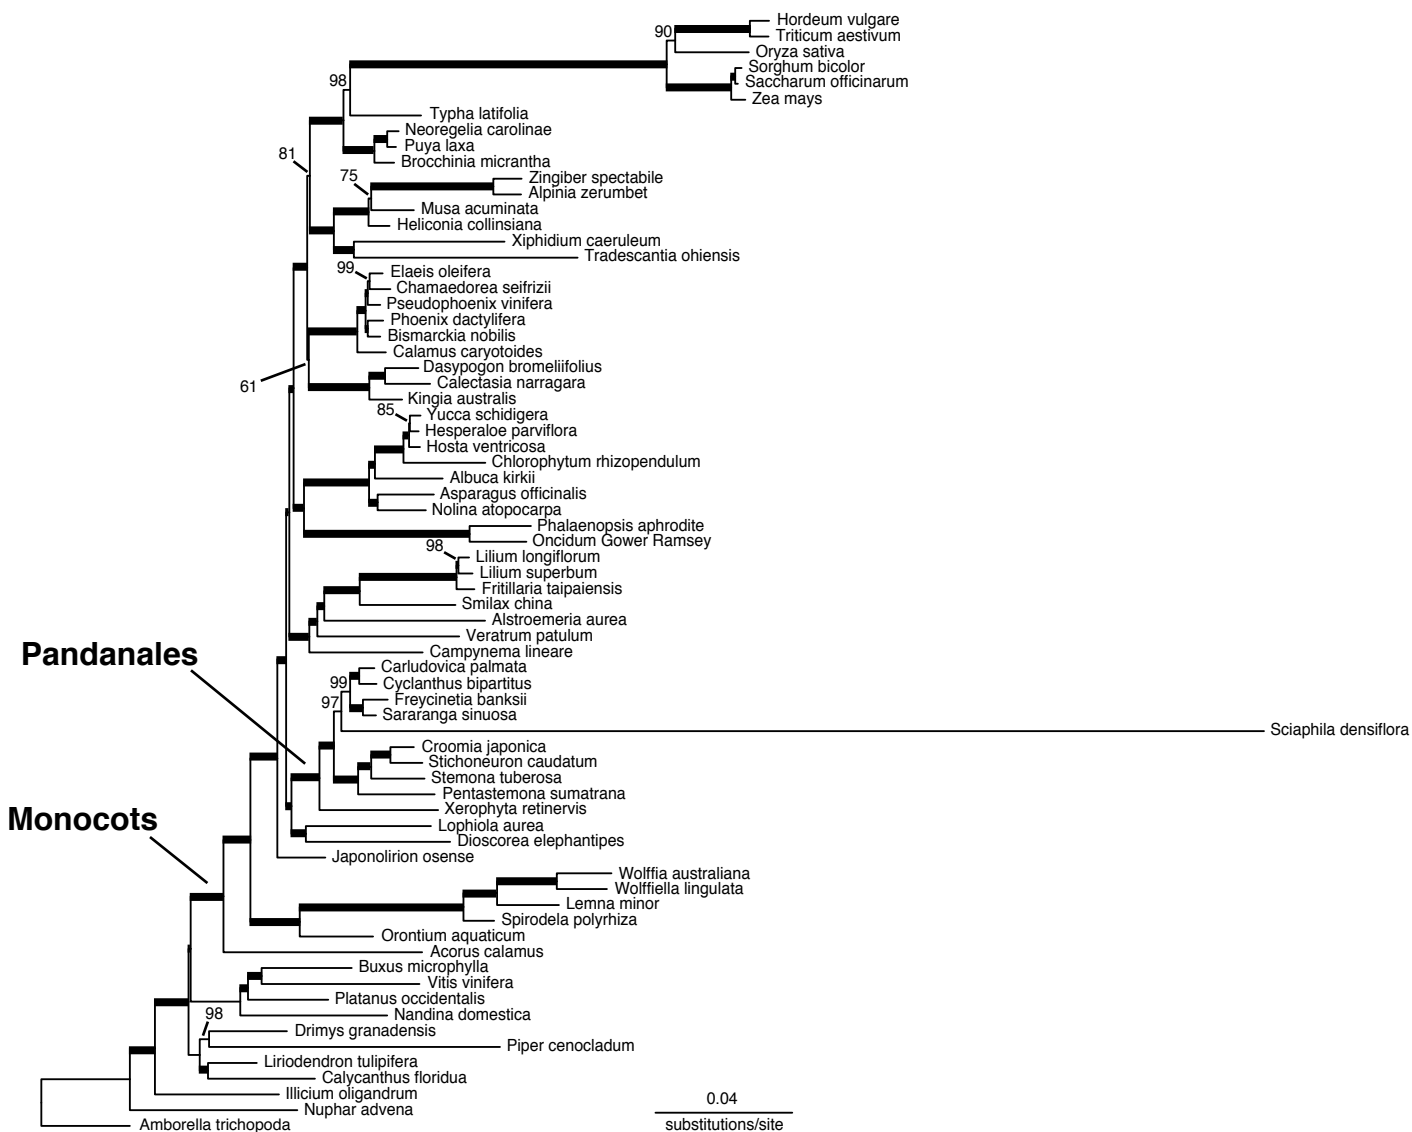

Supplement: supp_evv134_Suppl_figs.pdf [file supp_evv134_Suppl_figs.pdf]
